# Supplementary material for: On the variation of cluster core characteristics by an endohedral atom. Shape variation in 8-ce [EAu4(PPh3)4]2+ (E = N, P, As, Sb) clusters
Source: Royal Society of Chemistry journal article supplement (doi:10.1039/d4cp01465k), 2024-01-01
Supplement: d4cp01465k3.pdf [file d4cp01465k3.pdf]

Supporting information for:

## On the Variation of Cluster Core Characteristics by Endohedral Atom. Shape Variation in 8-*ce* [EAu<sub>4</sub>(PPh<sub>3</sub>)<sub>4</sub>]<sup>2+</sup> (E=N, P, As, Sb) Clusters

Raul Guajardo-Maturana,<sup>a</sup> Desmond MacLeod Carey,<sup>b</sup> Peter L. Rodríguez-Kessler,<sup>c</sup> and Alvaro Muñoz-Castro<sup>d\*</sup>

<sup>a</sup>*Instituto de Investigación Interdisciplinar en Ciencias Biomédicas SEK (I3CBSEK) Chile, Universidad SEK, Santiago, Chile.*

<sup>b</sup>*Laboratorio de Química Inorgánica y Materiales Moleculares, Facultad de Ingeniería, Universidad Autónoma de Chile, Llano Subercaceaux 2801, San Miguel, Santiago, Chile.*

<sup>c</sup>*Centro de Investigaciones en Óptica A.C., Loma del Bosque 115, Col. Lomas del Campestre, León, Guanajuato, 37150, Mexico.*

<sup>d</sup>*Facultad de Ingeniería, Arquitectura y Diseño, Universidad San Sebastián, Bellavista 7, Santiago, 8420524, Chile.*

### Content

|                                                                                                                                                               |         |
|---------------------------------------------------------------------------------------------------------------------------------------------------------------|---------|
| <b>Figure S1.</b> Extended picture for the isosurfaces for 1S <sup>2</sup> , 1P <sup>6</sup> and frontier orbitals for <b>1a</b> and <b>3b</b> .              | Page S2 |
| <b>Figure S2.</b> Natural transition orbitals (NTOs) representation for <b>1a</b> and <b>3b</b> , respectively.                                               | Page S3 |
| <b>Figure S3.</b> Canonical molecular orbitals involved in the discussed four and five main transitions discussed for <b>1a</b> and <b>3b</b> , respectively. | Page S4 |
| <b>Table S1.</b> Cartesian coordinates for the optimized geometries in Angstrom (Å) in a multipleXYZ format.                                                  | Page S5 |

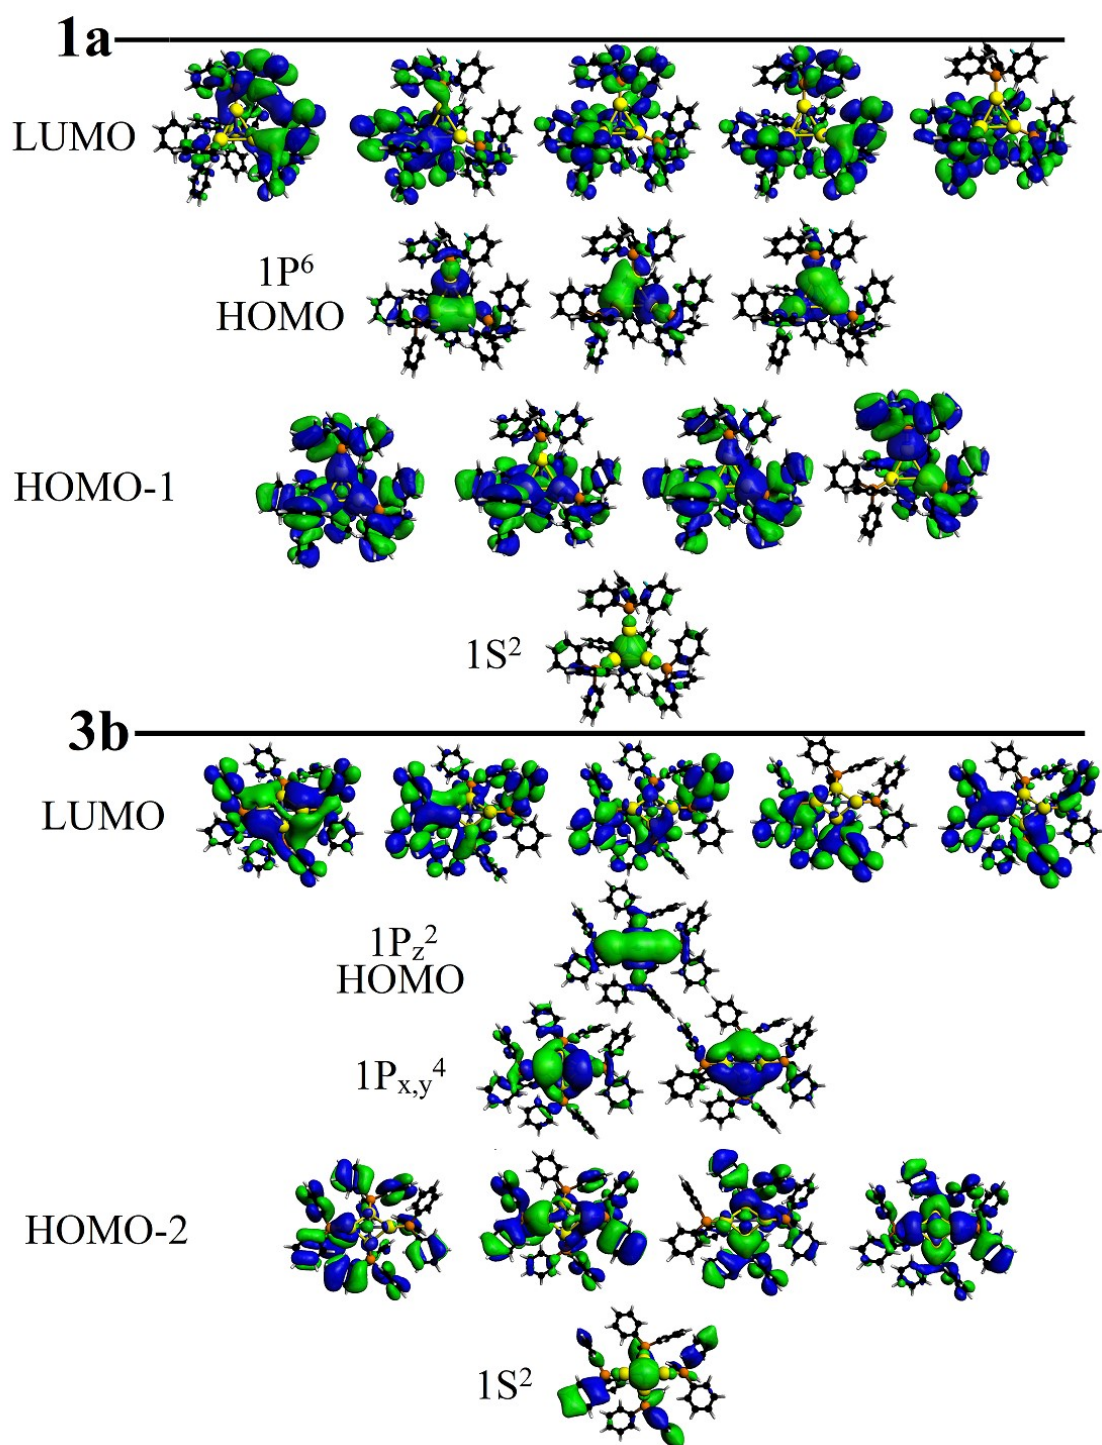

**Figure S1.** Extended picture for the isosurfaces for  $1S^2$ ,  $1P^6$  and frontier orbitals for **1a** and **3b**.

## 1a

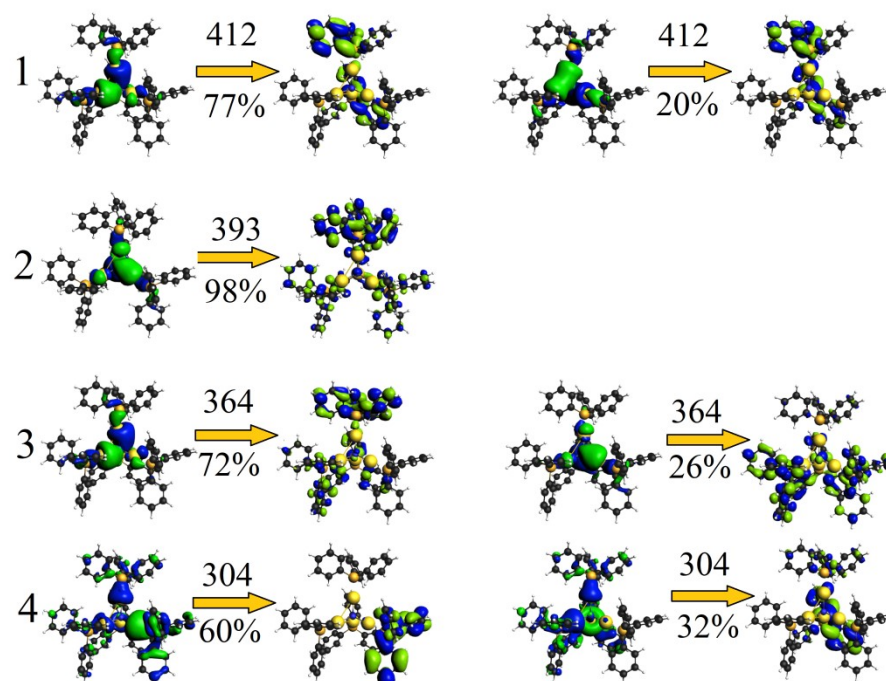

## 3b

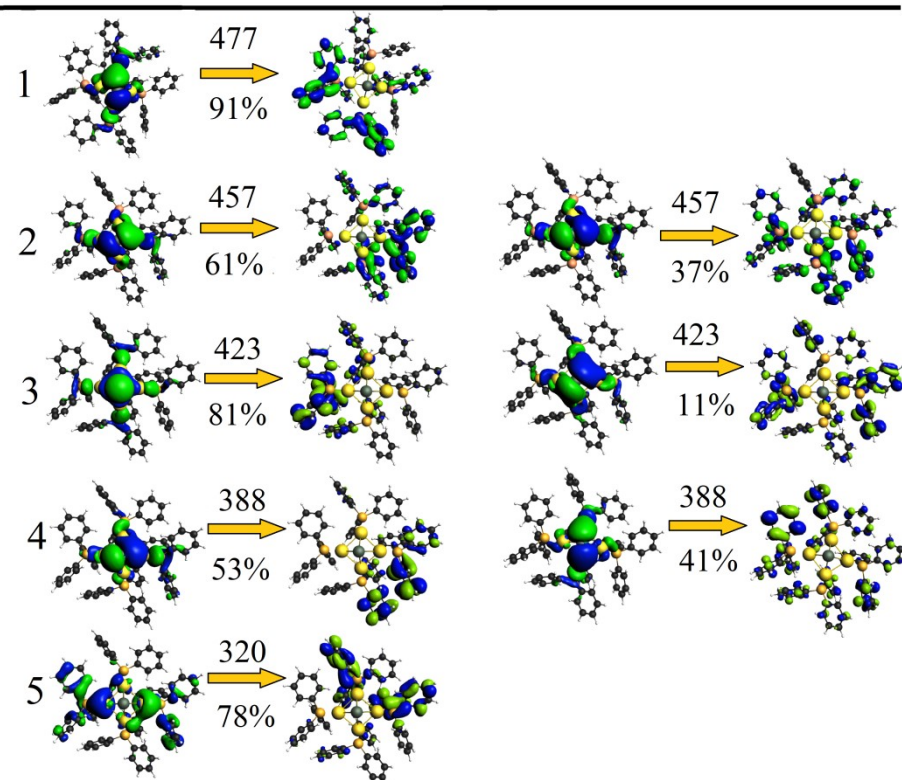

**Figure S2.** Natural transition orbitals (NTOs) representation of the *electron*→*hole* transition, involving occupied (*electron*) and unoccupied NTOs (*hole*) leading to the four and five main transitions discussed for **1a** and **3b**, respectively, denoting their percentage contribution. Wavelength for each transition given in nm.

# 1a

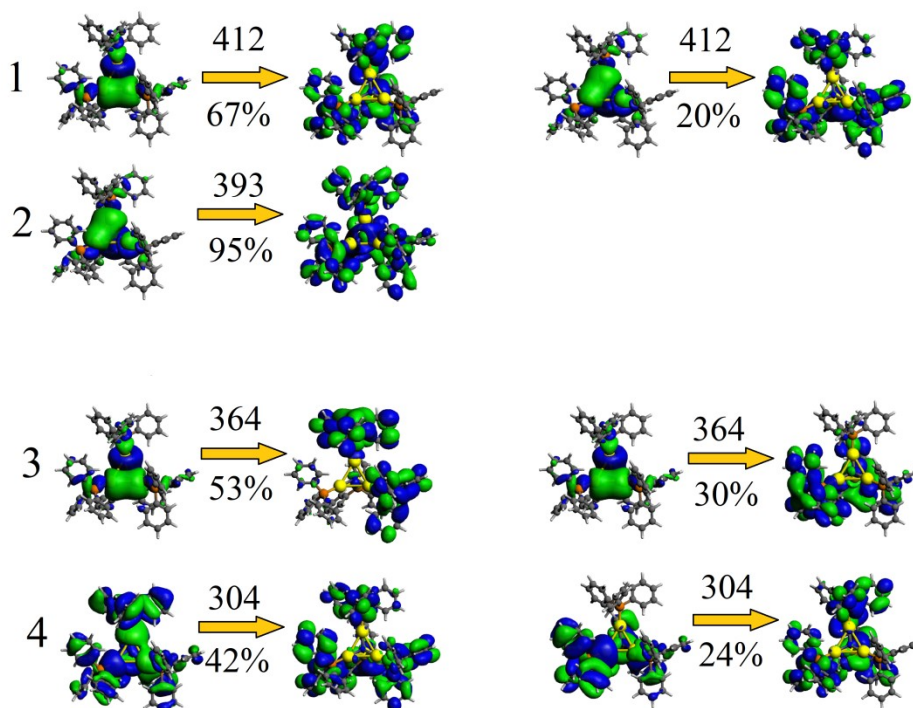

# 3b

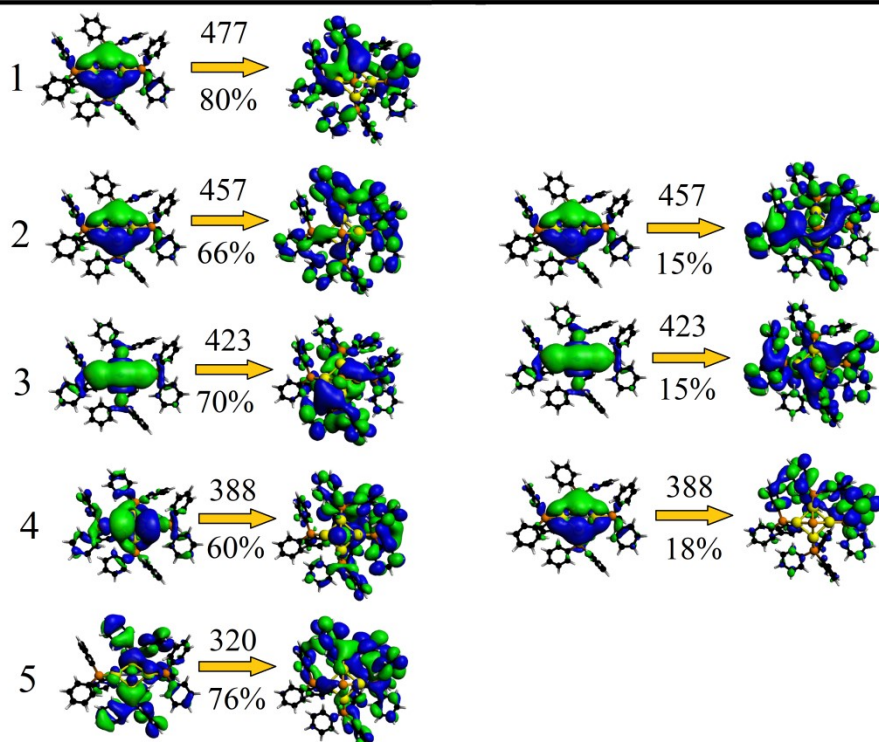

**Figure S3.** Canonical molecular orbitals involved in the discussed four and five main transitions discussed for **1a** and **3b**, respectively, denoting their percentage contribution. Wavelength for each transition given in nm.

**Table S1.** Cartesian coordinates for the optimized geometries in Angstrom (Å) in a multipleXYZ format.

```

141
[NAu4(PPh3)4]+ Tetrahedro
Au      11.763368000    11.666633000    5.621714000
Au      8.574031000    11.726962000    4.656727000
Au      9.650241000    9.362548000    6.737444000
Au      10.575427000    9.364479000    3.550639000
P       11.085452000    8.016015000    1.821188000
C       9.764856000    6.834652000    1.397359000
C       9.608844000    6.346036000    0.093902000
C       8.594268000    5.431691000    -0.188655000
C       7.733636000    5.004613000    0.825326000
C       7.884949000    5.492613000    2.125651000
C       8.896420000    6.408086000    2.413845000
C       12.562937000    6.994233000    2.144551000
C       13.651654000    7.595267000    2.797942000
C       14.798585000    6.850690000    3.064750000
C       14.865000000    5.504803000    2.689660000
C       13.781660000    4.905280000    2.045572000
C       12.630590000    5.646498000    1.772431000
C       11.450113000    8.897380000    0.268859000
C       12.395193000    8.421414000    -0.648181000
C       12.619714000    9.116574000    -1.837555000
C       11.907092000    10.286278000    -2.111501000
C       10.966822000    10.765398000    -1.194859000
C       10.738389000    10.075536000    -0.005188000
H       10.271222000    6.689670000    -0.700571000
H       8.471865000    5.059803000    -1.204400000
H       6.935178000    4.298561000    0.599293000
H       7.206172000    5.170606000    2.914146000
H       9.009818000    6.808870000    3.421398000
H       13.586869000    8.641543000    3.099876000
H       15.641605000    7.313960000    3.573676000
H       15.758754000    4.922294000    2.906129000
H       13.826317000    3.856049000    1.759644000
H       11.781094000    5.174647000    1.279967000
H       12.960232000    7.515964000    -0.427253000
H       13.359405000    8.747888000    -2.546865000
H       12.093110000    10.833462000    -3.036437000
H       10.424232000    11.687129000    -1.403111000
H       10.018917000    10.447463000    0.726015000
P       9.085656000    8.042383000    8.471606000
C       10.399056000    6.881589000    8.963802000
C       10.533109000    6.438772000    10.286310000
C       11.544874000    5.538060000    10.618340000
C       12.423993000    5.079043000    9.634987000
C       12.294664000    5.522339000    8.315844000
C       11.286692000    6.423791000    7.978499000
C       7.629025000    7.004782000    8.115605000
C       6.570739000    7.582769000    7.395329000
C       5.441235000    6.825770000    7.093052000
C       5.364259000    5.489654000    7.499332000
C       6.417606000    4.912452000    8.209780000
C       7.550820000    5.666941000    8.519227000
C       8.663426000    8.958062000    9.988644000
C       7.685988000    8.502601000    10.881509000
C       7.408515000    9.230059000    12.038615000
C       8.103334000    10.411485000    12.305975000
C       9.079455000    10.868780000    11.415985000
C       9.357746000    10.147972000    10.256672000
H       9.855935000    6.807689000    11.055420000
H       11.651352000    5.201900000    11.648250000
H       13.218201000    4.382838000    9.899614000
H       12.985939000    5.172451000    7.550271000
H       11.189508000    6.787380000    6.955259000

```

|   |              |              |              |
|---|--------------|--------------|--------------|
| H | 6.647972000  | 8.622152000  | 7.067789000  |
| H | 4.621798000  | 7.271677000  | 6.533178000  |
| H | 4.484948000  | 4.896185000  | 7.257533000  |
| H | 6.361934000  | 3.869559000  | 8.520531000  |
| H | 8.378265000  | 5.212980000  | 9.063281000  |
| H | 7.134744000  | 7.587684000  | 10.664902000 |
| H | 6.642896000  | 8.877649000  | 12.727377000 |
| H | 7.875788000  | 10.981640000 | 13.203984000 |
| H | 9.611288000  | 11.795520000 | 11.619951000 |
| H | 10.102835000 | 10.504733000 | 9.544799000  |
| P | 13.550928000 | 12.920010000 | 6.153745000  |
| C | 14.994542000 | 12.593120000 | 5.091477000  |
| C | 15.802996000 | 13.623660000 | 4.596298000  |
| C | 16.892993000 | 13.320048000 | 3.778416000  |
| C | 17.178463000 | 11.993086000 | 3.454685000  |
| C | 16.371458000 | 10.962509000 | 3.948611000  |
| C | 15.279119000 | 11.258658000 | 4.760666000  |
| C | 14.152368000 | 12.676428000 | 7.855599000  |
| C | 13.212430000 | 12.428034000 | 8.867639000  |
| C | 13.635834000 | 12.260146000 | 10.185025000 |
| C | 14.996830000 | 12.329877000 | 10.496622000 |
| C | 15.933128000 | 12.569365000 | 9.489992000  |
| C | 15.516405000 | 12.745177000 | 8.170232000  |
| C | 13.218490000 | 14.706114000 | 6.009276000  |
| C | 13.842256000 | 15.644395000 | 6.841859000  |
| C | 13.559127000 | 17.003451000 | 6.691291000  |
| C | 12.656102000 | 17.426422000 | 5.712884000  |
| C | 12.030122000 | 16.491555000 | 4.883171000  |
| C | 12.304110000 | 15.132771000 | 5.032992000  |
| H | 15.572892000 | 14.660273000 | 4.839159000  |
| H | 17.513904000 | 14.124155000 | 3.386174000  |
| H | 18.022949000 | 11.762290000 | 2.808522000  |
| H | 16.590043000 | 9.928013000  | 3.687894000  |
| H | 14.634045000 | 10.462737000 | 5.134937000  |
| H | 12.152344000 | 12.354119000 | 8.608083000  |
| H | 12.905431000 | 12.059516000 | 10.969767000 |
| H | 15.327174000 | 12.186607000 | 11.523828000 |
| H | 16.994462000 | 12.614580000 | 9.728482000  |
| H | 16.248714000 | 12.921261000 | 7.382630000  |
| H | 14.537487000 | 15.311672000 | 7.612148000  |
| H | 14.039865000 | 17.732345000 | 7.344169000  |
| H | 12.433603000 | 18.487498000 | 5.602279000  |
| H | 11.317797000 | 16.817771000 | 4.127602000  |
| H | 11.803210000 | 14.395068000 | 4.405259000  |
| P | 6.830142000  | 13.043644000 | 4.124206000  |
| C | 5.375291000  | 12.751415000 | 5.182535000  |
| C | 4.615734000  | 13.800728000 | 5.715320000  |
| C | 3.516638000  | 13.521125000 | 6.529585000  |
| C | 3.172927000  | 12.198950000 | 6.813079000  |
| C | 3.930204000  | 11.149245000 | 6.280475000  |
| C | 5.031165000  | 11.420931000 | 5.471849000  |
| C | 6.221637000  | 12.824722000 | 2.421950000  |
| C | 7.150560000  | 12.513647000 | 1.415109000  |
| C | 6.720643000  | 12.351477000 | 0.099655000  |
| C | 5.364975000  | 12.489763000 | -0.215892000 |
| C | 4.439938000  | 12.791198000 | 0.785720000  |
| C | 4.864797000  | 12.958119000 | 2.104407000  |
| C | 7.213113000  | 14.817918000 | 4.283643000  |
| C | 6.610994000  | 15.779897000 | 3.462756000  |
| C | 6.938276000  | 17.127423000 | 3.617581000  |
| C | 7.863165000  | 17.517569000 | 4.589094000  |
| C | 8.464243000  | 16.559624000 | 5.410223000  |
| C | 8.146797000  | 15.210941000 | 5.255523000  |
| H | 4.890883000  | 14.834746000 | 5.504579000  |
| H | 2.933327000  | 14.340081000 | 6.949791000  |
| H | 2.320071000  | 11.985489000 | 7.454987000  |
| H | 3.664863000  | 10.119006000 | 6.508022000  |
| H | 5.635684000  | 10.608940000 | 5.068311000  |



|                       |              |              |              |
|-----------------------|--------------|--------------|--------------|
| H                     | 8.202332000  | 12.394403000 | 1.676097000  |
| H                     | 7.437426000  | 12.108499000 | -0.680659000 |
| H                     | 5.027544000  | 12.352316000 | -1.241771000 |
| H                     | 3.380749000  | 12.890991000 | 0.542242000  |
| H                     | 4.143729000  | 13.179403000 | 2.889181000  |
| H                     | 5.898995000  | 15.474221000 | 2.696050000  |
| H                     | 6.474148000  | 17.872098000 | 2.972145000  |
| H                     | 8.120266000  | 18.570107000 | 4.701850000  |
| H                     | 9.191161000  | 16.859383000 | 6.162505000  |
| H                     | 8.629900000  | 14.455378000 | 5.874991000  |
| N                     | 10.142702000 | 10.535924000 | 5.154935000  |
| 141                   |              |              |              |
| [NAu4(PPh3)4]+ Planar |              |              |              |
| Au                    | 2.132449000  | 16.373489000 | 2.475745000  |
| Au                    | 2.026115000  | 14.973353000 | -0.052444000 |
| Au                    | 1.810640000  | 13.166241000 | 2.165591000  |
| Au                    | -0.101191000 | 14.859504000 | 3.510213000  |
| N                     | 0.838518000  | 14.951921000 | 1.657970000  |
| P                     | 3.528162000  | 17.954466000 | 3.264334000  |
| C                     | 2.980812000  | 18.792117000 | 4.782911000  |
| C                     | 1.932342000  | 18.221277000 | 5.516618000  |
| C                     | 1.487664000  | 18.829842000 | 6.689570000  |
| C                     | 2.086058000  | 20.009812000 | 7.132262000  |
| C                     | 3.128024000  | 20.587215000 | 6.398771000  |
| C                     | 3.573403000  | 19.985350000 | 5.222814000  |
| C                     | 3.804858000  | 19.287783000 | 2.049046000  |
| C                     | 2.730622000  | 19.647174000 | 1.219816000  |
| C                     | 2.864269000  | 20.706944000 | 0.325636000  |
| C                     | 4.070988000  | 21.407774000 | 0.248151000  |
| C                     | 5.149002000  | 21.038053000 | 1.055008000  |
| C                     | 5.020227000  | 19.977940000 | 1.954050000  |
| C                     | 5.183430000  | 17.274366000 | 3.608354000  |
| C                     | 5.764764000  | 16.463816000 | 2.617214000  |
| C                     | 7.031363000  | 15.922913000 | 2.815546000  |
| C                     | 7.716909000  | 16.168072000 | 4.010917000  |
| C                     | 7.128425000  | 16.946725000 | 5.008894000  |
| C                     | 5.862573000  | 17.502836000 | 4.809782000  |
| P                     | 3.556375000  | 14.868958000 | -1.691715000 |
| C                     | 5.180858000  | 14.376685000 | -1.011793000 |
| C                     | 5.218894000  | 13.539807000 | 0.112504000  |
| C                     | 6.440294000  | 13.083812000 | 0.602673000  |
| C                     | 7.630479000  | 13.470658000 | -0.016647000 |
| C                     | 7.599027000  | 14.325318000 | -1.121286000 |
| C                     | 6.378130000  | 14.780159000 | -1.621055000 |
| C                     | 3.921559000  | 16.428753000 | -2.553680000 |
| C                     | 4.077101000  | 16.503038000 | -3.943021000 |
| C                     | 4.415740000  | 17.719684000 | -4.539913000 |
| C                     | 4.605749000  | 18.856188000 | -3.752826000 |
| C                     | 4.445622000  | 18.783455000 | -2.365538000 |
| C                     | 4.095186000  | 17.576917000 | -1.764515000 |
| C                     | 3.189397000  | 13.638023000 | -2.985021000 |
| C                     | 1.849469000  | 13.297381000 | -3.219825000 |
| C                     | 1.528772000  | 12.362685000 | -4.203955000 |
| C                     | 2.543417000  | 11.761860000 | -4.953711000 |
| C                     | 3.879738000  | 12.094764000 | -4.716587000 |
| C                     | 4.205447000  | 13.028009000 | -3.732868000 |
| P                     | 2.896658000  | 11.232117000 | 2.563136000  |
| C                     | 3.646682000  | 10.604825000 | 1.026522000  |
| C                     | 2.950306000  | 10.820931000 | -0.174161000 |
| C                     | 3.499266000  | 10.402960000 | -1.383285000 |
| C                     | 4.748004000  | 9.776693000  | -1.402852000 |
| C                     | 5.442316000  | 9.558220000  | -0.211701000 |
| C                     | 4.894455000  | 9.970589000  | 1.004515000  |
| C                     | 1.902706000  | 9.869005000  | 3.233686000  |
| C                     | 2.212058000  | 8.531615000  | 2.948724000  |
| C                     | 1.431933000  | 7.508963000  | 3.488282000  |
| C                     | 0.339225000  | 7.818425000  | 4.302331000  |
| C                     | 0.024431000  | 9.151549000  | 4.578609000  |

|   |              |              |              |
|---|--------------|--------------|--------------|
| C | 0.802598000  | 10.178888000 | 4.047743000  |
| C | 4.288402000  | 11.460811000 | 3.714866000  |
| C | 4.737606000  | 10.430541000 | 4.550676000  |
| C | 5.827756000  | 10.644404000 | 5.395928000  |
| C | 6.470646000  | 11.884031000 | 5.408402000  |
| C | 6.018536000  | 12.915930000 | 4.581688000  |
| C | 4.926581000  | 12.710518000 | 3.741212000  |
| P | -0.508728000 | 14.714682000 | 5.709756000  |
| C | -1.166822000 | 13.122491000 | 6.300145000  |
| C | -2.423157000 | 12.707607000 | 5.828319000  |
| C | -2.959393000 | 11.494578000 | 6.254053000  |
| C | -2.239446000 | 10.682432000 | 7.137148000  |
| C | -0.981686000 | 11.083781000 | 7.589687000  |
| C | -0.442613000 | 12.303963000 | 7.174831000  |
| C | -1.567596000 | 15.985574000 | 6.464420000  |
| C | -1.621484000 | 17.248409000 | 5.857140000  |
| C | -2.340807000 | 18.279517000 | 6.459500000  |
| C | -3.017628000 | 18.049934000 | 7.660126000  |
| C | -2.978123000 | 16.787795000 | 8.258465000  |
| C | -2.253718000 | 15.754790000 | 7.664493000  |
| C | 1.107896000  | 14.943795000 | 6.539433000  |
| C | 1.184989000  | 15.489310000 | 7.828666000  |
| C | 2.428908000  | 15.758216000 | 8.399943000  |
| C | 3.599857000  | 15.493467000 | 7.686295000  |
| C | 3.528257000  | 14.930468000 | 6.411031000  |
| C | 2.289617000  | 14.648469000 | 5.840660000  |
| H | 2.238502000  | 14.225093000 | 4.837536000  |
| H | 4.435856000  | 14.715831000 | 5.851122000  |
| H | 4.569523000  | 15.727488000 | 8.125026000  |
| H | 2.480936000  | 16.193299000 | 9.396855000  |
| H | 0.273486000  | 15.728654000 | 8.376148000  |
| H | 0.539575000  | 12.618342000 | 7.526529000  |
| H | -0.413210000 | 10.446855000 | 8.265379000  |
| H | -2.659076000 | 9.732132000  | 7.465967000  |
| H | -3.937840000 | 11.178906000 | 5.893718000  |
| H | -2.976375000 | 13.338223000 | 5.131630000  |
| H | -2.223594000 | 14.768531000 | 8.127224000  |
| H | -3.515033000 | 16.605835000 | 9.187958000  |
| H | -3.586814000 | 18.853039000 | 8.125377000  |
| H | -2.378854000 | 19.259893000 | 5.987458000  |
| H | -1.099129000 | 17.414010000 | 4.913868000  |
| H | 8.707925000  | 15.742126000 | 4.164663000  |
| H | 7.473936000  | 15.299909000 | 2.040540000  |
| H | 5.220649000  | 16.252399000 | 1.695591000  |
| H | 7.655769000  | 17.130372000 | 5.944209000  |
| H | 5.401121000  | 18.109334000 | 5.587193000  |
| H | 1.468055000  | 17.303183000 | 5.156204000  |
| H | 0.667379000  | 18.383611000 | 7.249101000  |
| H | 1.733226000  | 20.488828000 | 8.045864000  |
| H | 3.584969000  | 21.516095000 | 6.736661000  |
| H | 4.368251000  | 20.449088000 | 4.640287000  |
| H | 5.864685000  | 19.681611000 | 2.575834000  |
| H | 6.093968000  | 21.574410000 | 0.983588000  |
| H | 4.173672000  | 22.237360000 | -0.450587000 |
| H | 2.029759000  | 20.980744000 | -0.317108000 |
| H | 1.796753000  | 19.086020000 | 1.276284000  |
| H | 3.952776000  | 17.525167000 | -0.683572000 |
| H | 4.586279000  | 19.667204000 | -1.746969000 |
| H | 4.874411000  | 19.803270000 | -4.220515000 |
| H | 4.531977000  | 17.775956000 | -5.621190000 |
| H | 3.932931000  | 15.614931000 | -4.557009000 |
| H | 5.248443000  | 13.270759000 | -3.534856000 |
| H | 4.671723000  | 11.620750000 | -5.294592000 |
| H | 2.293039000  | 11.028482000 | -5.719316000 |
| H | 0.487066000  | 12.099896000 | -4.381752000 |
| H | 1.065583000  | 13.760807000 | -2.618264000 |
| H | 1.989914000  | 11.337473000 | -0.155662000 |
| H | 2.958351000  | 10.578603000 | -2.312178000 |



|   |              |              |              |
|---|--------------|--------------|--------------|
| H | 5.181494000  | 9.463808000  | -2.352034000 |
| H | 6.416965000  | 9.073507000  | -0.227542000 |
| H | 5.443162000  | 9.816141000  | 1.932939000  |
| H | 4.226605000  | 9.468064000  | 4.547415000  |
| H | 7.317916000  | 12.050118000 | 6.072741000  |
| H | 6.508832000  | 13.887405000 | 4.593494000  |
| H | 4.555327000  | 13.521117000 | 3.113098000  |
| H | 6.171334000  | 9.842910000  | 6.048492000  |
| H | 3.049304000  | 8.294541000  | 2.293413000  |
| H | 1.669999000  | 6.470529000  | 3.261585000  |
| H | -0.277120000 | 7.017745000  | 4.710776000  |
| H | -0.834784000 | 9.397777000  | 5.197731000  |
| H | 0.548801000  | 11.221392000 | 4.246687000  |
| H | 6.354372000  | 15.454939000 | -2.476779000 |
| H | 8.525903000  | 14.641814000 | -1.596338000 |
| H | 8.584844000  | 13.111975000 | 0.367684000  |
| H | 6.459249000  | 12.431373000 | 1.473832000  |
| H | 4.285550000  | 13.253234000 | 0.597337000  |

141

[PAu4(PPh3)4]+ Tetrahedro

|    |              |              |              |
|----|--------------|--------------|--------------|
| Au | 11.915477000 | 11.855685000 | 5.698272000  |
| Au | 8.338454000  | 11.832303000 | 4.542290000  |
| Au | 9.673985000  | 9.131647000  | 6.976132000  |
| Au | 10.579334000 | 9.088249000  | 3.323305000  |
| P  | 11.034670000 | 7.680304000  | 1.547426000  |
| C  | 9.858667000  | 6.299556000  | 1.391080000  |
| C  | 9.584779000  | 5.705851000  | 0.151630000  |
| C  | 8.706550000  | 4.625225000  | 0.077352000  |
| C  | 8.092914000  | 4.139932000  | 1.234836000  |
| C  | 8.355593000  | 4.737415000  | 2.470835000  |
| C  | 9.234882000  | 5.816036000  | 2.551597000  |
| C  | 12.674492000 | 6.900513000  | 1.705414000  |
| C  | 13.709706000 | 7.644811000  | 2.294487000  |
| C  | 14.975579000 | 7.080231000  | 2.440747000  |
| C  | 15.215258000 | 5.772524000  | 2.008195000  |
| C  | 14.186004000 | 5.029467000  | 1.426189000  |
| C  | 12.916259000 | 5.589264000  | 1.275673000  |
| C  | 11.024055000 | 8.486346000  | -0.084976000 |
| C  | 11.898544000 | 8.094698000  | -1.107157000 |
| C  | 11.815245000 | 8.698538000  | -2.362961000 |
| C  | 10.865200000 | 9.694262000  | -2.600191000 |
| C  | 9.999302000  | 10.094251000 | -1.577974000 |
| C  | 10.078662000 | 9.497572000  | -0.320397000 |
| H  | 10.050160000 | 6.095274000  | -0.753120000 |
| H  | 8.495669000  | 4.168129000  | -0.887829000 |
| H  | 7.399148000  | 3.302811000  | 1.171532000  |
| H  | 7.867274000  | 4.368521000  | 3.371326000  |
| H  | 9.433443000  | 6.298595000  | 3.510092000  |
| H  | 13.510443000 | 8.657958000  | 2.646071000  |
| H  | 15.775916000 | 7.655803000  | 2.903285000  |
| H  | 16.202379000 | 5.329209000  | 2.133046000  |
| H  | 14.367645000 | 4.008044000  | 1.095421000  |
| H  | 12.109424000 | 5.003486000  | 0.836818000  |
| H  | 12.644730000 | 7.322891000  | -0.918052000 |
| H  | 12.496045000 | 8.391925000  | -3.155875000 |
| H  | 10.804348000 | 10.165210000 | -3.581486000 |
| H  | 9.263245000  | 10.875507000 | -1.761834000 |
| H  | 9.413327000  | 9.811777000  | 0.484895000  |
| P  | 9.188160000  | 7.765763000  | 8.775193000  |
| C  | 10.382911000 | 6.414852000  | 9.018268000  |
| C  | 10.641904000 | 5.887307000  | 10.290566000 |
| C  | 11.534076000 | 4.824340000  | 10.433170000 |
| C  | 12.174036000 | 4.290814000  | 9.311752000  |
| C  | 11.926033000 | 4.823044000  | 8.042639000  |
| C  | 11.035400000 | 5.884845000  | 7.893698000  |
| C  | 7.572019000  | 6.950144000  | 8.572715000  |
| C  | 6.565393000  | 7.641238000  | 7.879318000  |
| C  | 5.317712000  | 7.048512000  | 7.691831000  |

|   |              |              |              |
|---|--------------|--------------|--------------|
| C | 5.069640000  | 5.764747000  | 8.187088000  |
| C | 6.0712211000 | 5.074707000  | 8.873610000  |
| C | 7.322277000  | 5.662682000  | 9.065790000  |
| C | 9.126713000  | 8.613303000  | 10.385064000 |
| C | 8.189193000  | 8.272308000  | 11.367970000 |
| C | 8.219111000  | 8.910752000  | 12.609501000 |
| C | 9.179717000  | 9.889333000  | 12.871060000 |
| C | 10.110794000 | 10.236404000 | 11.887281000 |
| C | 10.085082000 | 9.605825000  | 10.644767000 |
| H | 10.152768000 | 6.312974000  | 11.166521000 |
| H | 11.735665000 | 4.419062000  | 11.424007000 |
| H | 12.875968000 | 3.466255000  | 9.428674000  |
| H | 12.436524000 | 4.417551000  | 7.170318000  |
| H | 10.849907000 | 6.317483000  | 6.909006000  |
| H | 6.774913000  | 8.634435000  | 7.478365000  |
| H | 4.539687000  | 7.583208000  | 7.149533000  |
| H | 4.097630000  | 5.298267000  | 8.030172000  |
| H | 5.882625000  | 4.072155000  | 9.254131000  |
| H | 8.108773000  | 5.117323000  | 9.586418000  |
| H | 7.437036000  | 7.511898000  | 11.160645000 |
| H | 7.488234000  | 8.644157000  | 13.371454000 |
| H | 9.198941000  | 10.387499000 | 13.840203000 |
| H | 10.855868000 | 11.003996000 | 12.089528000 |
| H | 10.803845000 | 9.877814000  | 9.870871000  |
| P | 13.669095000 | 13.244683000 | 6.277196000  |
| C | 15.195385000 | 12.884649000 | 5.352622000  |
| C | 16.111920000 | 13.883442000 | 4.999687000  |
| C | 17.288641000 | 13.542357000 | 4.331891000  |
| C | 17.553092000 | 12.209084000 | 4.011653000  |
| C | 16.635231000 | 11.212053000 | 4.354348000  |
| C | 15.457309000 | 11.546001000 | 5.019767000  |
| C | 14.148190000 | 13.147671000 | 8.032599000  |
| C | 13.128534000 | 13.008059000 | 8.987912000  |
| C | 13.446331000 | 12.982399000 | 10.344431000 |
| C | 14.777997000 | 13.086866000 | 10.754747000 |
| C | 15.794123000 | 13.214114000 | 9.805260000  |
| C | 15.483381000 | 13.241701000 | 8.445252000  |
| C | 13.293795000 | 15.006082000 | 6.001419000  |
| C | 13.934109000 | 16.017571000 | 6.731797000  |
| C | 13.619195000 | 17.354383000 | 6.490331000  |
| C | 12.659109000 | 17.686664000 | 5.530664000  |
| C | 12.011120000 | 16.680721000 | 4.809114000  |
| C | 12.325702000 | 15.342632000 | 5.042283000  |
| H | 15.901959000 | 14.924998000 | 5.239455000  |
| H | 17.996563000 | 14.321689000 | 4.055373000  |
| H | 18.469814000 | 11.947672000 | 3.484693000  |
| H | 16.837009000 | 10.173488000 | 4.096021000  |
| H | 14.729124000 | 10.776550000 | 5.279677000  |
| H | 12.092018000 | 12.916144000 | 8.659692000  |
| H | 12.655665000 | 12.879764000 | 11.085707000 |
| H | 15.024085000 | 13.063369000 | 11.815591000 |
| H | 16.833059000 | 13.290028000 | 10.122397000 |
| H | 16.277741000 | 13.330926000 | 7.704359000  |
| H | 14.663799000 | 15.757945000 | 7.498314000  |
| H | 14.118465000 | 18.137255000 | 7.059131000  |
| H | 12.410333000 | 18.731798000 | 5.350624000  |
| H | 11.252457000 | 16.936749000 | 4.071803000  |
| H | 11.812499000 | 14.550365000 | 4.495803000  |
| P | 6.633190000  | 13.277177000 | 3.957332000  |
| C | 5.074290000  | 12.944592000 | 4.835754000  |
| C | 4.202840000  | 13.965505000 | 5.235427000  |
| C | 3.004080000  | 13.644855000 | 5.874267000  |
| C | 2.674408000  | 12.310462000 | 6.118218000  |
| C | 3.546000000  | 11.290221000 | 5.726323000  |
| C | 4.744265000  | 11.603024000 | 5.089654000  |
| C | 6.191485000  | 13.249202000 | 2.189794000  |
| C | 7.227710000  | 13.121838000 | 1.250677000  |
| C | 6.936282000  | 13.148549000 | -0.111777000 |

|                       |              |              |              |
|-----------------------|--------------|--------------|--------------|
| C                     | 5.613683000  | 13.292643000 | -0.544065000 |
| C                     | 4.581081000  | 13.406899000 | 0.389110000  |
| C                     | 4.866195000  | 13.384358000 | 1.754956000  |
| C                     | 7.065061000  | 15.014951000 | 4.293668000  |
| C                     | 6.473421000  | 16.068013000 | 3.580742000  |
| C                     | 6.834981000  | 17.385783000 | 3.859967000  |
| C                     | 7.790502000  | 17.657604000 | 4.843254000  |
| C                     | 8.387152000  | 16.610240000 | 5.550399000  |
| C                     | 8.028015000  | 15.290683000 | 5.277109000  |
| H                     | 4.464561000  | 15.007452000 | 5.055028000  |
| H                     | 2.329432000  | 14.440607000 | 6.186025000  |
| H                     | 1.740834000  | 12.064573000 | 6.621943000  |
| H                     | 3.292569000  | 10.249904000 | 5.924013000  |
| H                     | 5.437008000  | 10.813886000 | 4.792792000  |
| H                     | 8.256529000  | 13.000660000 | 1.595657000  |
| H                     | 7.740473000  | 13.057495000 | -0.840746000 |
| H                     | 5.388717000  | 13.311968000 | -1.609503000 |
| H                     | 3.549326000  | 13.511443000 | 0.055358000  |
| H                     | 4.060212000  | 13.466014000 | 2.483741000  |
| H                     | 5.744785000  | 15.854853000 | 2.798486000  |
| H                     | 6.376501000  | 18.200433000 | 3.301661000  |
| H                     | 8.075940000  | 18.688168000 | 5.052824000  |
| H                     | 9.142036000  | 16.819110000 | 6.306488000  |
| H                     | 8.504447000  | 14.465763000 | 5.809056000  |
| P                     | 10.132831000 | 10.469362000 | 5.133395000  |
| 141                   |              |              |              |
| [PAu4(PPh3)4]+ Planar |              |              |              |
| Au                    | 1.535564000  | 16.829212000 | 1.977072000  |
| Au                    | 2.205553000  | 14.851852000 | 0.016455000  |
| Au                    | 1.014464000  | 13.034666000 | 1.842715000  |
| Au                    | -0.052354000 | 15.018859000 | 3.537698000  |
| P                     | 0.023909000  | 15.139917000 | 1.104760000  |
| P                     | 3.030827000  | 18.378726000 | 2.782500000  |
| C                     | 2.576196000  | 19.145436000 | 4.368152000  |
| C                     | 1.744247000  | 18.412325000 | 5.226835000  |
| C                     | 1.440168000  | 18.906219000 | 6.493191000  |
| C                     | 1.952011000  | 20.140277000 | 6.900124000  |
| C                     | 2.760476000  | 20.885498000 | 6.037042000  |
| C                     | 3.074824000  | 20.391715000 | 4.770551000  |
| C                     | 3.391133000  | 19.769953000 | 1.660418000  |
| C                     | 2.322568000  | 20.294447000 | 0.917731000  |
| C                     | 2.522542000  | 21.397370000 | 0.090341000  |
| C                     | 3.790118000  | 21.976857000 | -0.008078000 |
| C                     | 4.859870000  | 21.444661000 | 0.713284000  |
| C                     | 4.664506000  | 20.341031000 | 1.545406000  |
| C                     | 4.637015000  | 17.572620000 | 3.103332000  |
| C                     | 4.956231000  | 16.417040000 | 2.375316000  |
| C                     | 6.164296000  | 15.761766000 | 2.599500000  |
| C                     | 7.058019000  | 16.250987000 | 3.555066000  |
| C                     | 6.740173000  | 17.396237000 | 4.289678000  |
| C                     | 5.530926000  | 18.055199000 | 4.068341000  |
| P                     | 3.995740000  | 14.704445000 | -1.413690000 |
| C                     | 5.568366000  | 14.155577000 | -0.670636000 |
| C                     | 5.544293000  | 13.024803000 | 0.158307000  |
| C                     | 6.719652000  | 12.570566000 | 0.752078000  |
| C                     | 7.924920000  | 13.240872000 | 0.521881000  |
| C                     | 7.949886000  | 14.369644000 | -0.299258000 |
| C                     | 6.774395000  | 14.832193000 | -0.893918000 |
| C                     | 4.384786000  | 16.309284000 | -2.170424000 |
| C                     | 4.856083000  | 16.422136000 | -3.484640000 |
| C                     | 5.182020000  | 17.678515000 | -3.997014000 |
| C                     | 5.043322000  | 18.817581000 | -3.199942000 |
| C                     | 4.568065000  | 18.706296000 | -1.890302000 |
| C                     | 4.231986000  | 17.456659000 | -1.376788000 |
| C                     | 3.689004000  | 13.541352000 | -2.781317000 |
| C                     | 2.362714000  | 13.332022000 | -3.187588000 |
| C                     | 2.083635000  | 12.453552000 | -4.233028000 |
| C                     | 3.125130000  | 11.775647000 | -4.872729000 |

|   |              |              |              |
|---|--------------|--------------|--------------|
| C | 4.445947000  | 11.978336000 | -4.465783000 |
| C | 4.730709000  | 12.858150000 | -3.420921000 |
| P | 2.122766000  | 11.121994000 | 2.448301000  |
| C | 3.112176000  | 10.505286000 | 1.046441000  |
| C | 2.630321000  | 10.737308000 | -0.251437000 |
| C | 3.362962000  | 10.308235000 | -1.355686000 |
| C | 4.582188000  | 9.653394000  | -1.171709000 |
| C | 5.066319000  | 9.420594000  | 0.117663000  |
| C | 4.336537000  | 9.846229000  | 1.226914000  |
| C | 1.155640000  | 9.714058000  | 3.064213000  |
| C | 1.687715000  | 8.416185000  | 3.094332000  |
| C | 0.917185000  | 7.362397000  | 3.580616000  |
| C | -0.388678000 | 7.597030000  | 4.024488000  |
| C | -0.920015000 | 8.887058000  | 3.990174000  |
| C | -0.150142000 | 9.949252000  | 3.515543000  |
| C | 3.371894000  | 11.471758000 | 3.726944000  |
| C | 3.432233000  | 10.766570000 | 4.933523000  |
| C | 4.429899000  | 11.065706000 | 5.864520000  |
| C | 5.375965000  | 12.052437000 | 5.585869000  |
| C | 5.310514000  | 12.762822000 | 4.382663000  |
| C | 4.301527000  | 12.492290000 | 3.465528000  |
| P | 0.025185000  | 14.716072000 | 5.808707000  |
| C | -0.312311000 | 12.998254000 | 6.306359000  |
| C | -1.623479000 | 12.510393000 | 6.172391000  |
| C | -1.916049000 | 11.198868000 | 6.534448000  |
| C | -0.901996000 | 10.360190000 | 7.009786000  |
| C | 0.404650000  | 10.835679000 | 7.114841000  |
| C | 0.704823000  | 12.154109000 | 6.764970000  |
| C | -1.089173000 | 15.728557000 | 6.826485000  |
| C | -1.513556000 | 16.963766000 | 6.316608000  |
| C | -2.317861000 | 17.798382000 | 7.091337000  |
| C | -2.708857000 | 17.398686000 | 8.371511000  |
| C | -2.299121000 | 16.161880000 | 8.876529000  |
| C | -1.491442000 | 15.325270000 | 8.107473000  |
| C | 1.705389000  | 15.099264000 | 6.398209000  |
| C | 1.949386000  | 15.468635000 | 7.728236000  |
| C | 3.235915000  | 15.831025000 | 8.123453000  |
| C | 4.279977000  | 15.826837000 | 7.195009000  |
| C | 4.041952000  | 15.444257000 | 5.874993000  |
| C | 2.760045000  | 15.079454000 | 5.473187000  |
| H | 2.566574000  | 14.800015000 | 4.436643000  |
| H | 4.852138000  | 15.441588000 | 5.149868000  |
| H | 5.280882000  | 16.129353000 | 7.500434000  |
| H | 3.420041000  | 16.128875000 | 9.154400000  |
| H | 1.131859000  | 15.494061000 | 8.447371000  |
| H | 1.724769000  | 12.527974000 | 6.851629000  |
| H | 1.195239000  | 10.180844000 | 7.477841000  |
| H | -1.131360000 | 9.333222000  | 7.289957000  |
| H | -2.936873000 | 10.829137000 | 6.445580000  |
| H | -2.411715000 | 13.164640000 | 5.798229000  |
| H | -1.181783000 | 14.354470000 | 8.492900000  |
| H | -2.614358000 | 15.845666000 | 9.869668000  |
| H | -3.344073000 | 18.047034000 | 8.973432000  |
| H | -2.647601000 | 18.755587000 | 6.691065000  |
| H | -1.214469000 | 17.261437000 | 5.310712000  |
| H | 8.001207000  | 15.734495000 | 3.731691000  |
| H | 6.402042000  | 14.864247000 | 2.032437000  |
| H | 4.241531000  | 16.017093000 | 1.652513000  |
| H | 7.429889000  | 17.773622000 | 5.043187000  |
| H | 5.268781000  | 18.929411000 | 4.663252000  |
| H | 1.339966000  | 17.456931000 | 4.890635000  |
| H | 0.797472000  | 18.329738000 | 7.157027000  |
| H | 1.709992000  | 20.528417000 | 7.888784000  |
| H | 3.143765000  | 21.856344000 | 6.347800000  |
| H | 3.696587000  | 20.977052000 | 4.093187000  |
| H | 5.502638000  | 19.918709000 | 2.097500000  |
| H | 5.851475000  | 21.884879000 | 0.624702000  |
| H | 3.945311000  | 22.836960000 | -0.658056000 |

|   |              |              |              |
|---|--------------|--------------|--------------|
| H | 1.690696000  | 21.800245000 | -0.483900000 |
| H | 1.338751000  | 19.828727000 | 0.988101000  |
| H | 3.835708000  | 17.368729000 | -0.364614000 |
| H | 4.446491000  | 19.593274000 | -1.271488000 |
| H | 5.294830000  | 19.797450000 | -3.604321000 |
| H | 5.540052000  | 17.766913000 | -5.021768000 |
| H | 4.958049000  | 15.533453000 | -4.106872000 |
| H | 5.759340000  | 13.004182000 | -3.092257000 |
| H | 5.257153000  | 11.446879000 | -4.960576000 |
| H | 2.905436000  | 11.084600000 | -5.685665000 |
| H | 1.052731000  | 12.291711000 | -4.544076000 |
| H | 1.553862000  | 13.851345000 | -2.670685000 |
| H | 1.691785000  | 11.276346000 | -0.387063000 |
| H | 2.988265000  | 10.498802000 | -2.359846000 |
| H | 5.160747000  | 9.331271000  | -2.036487000 |
| H | 6.020249000  | 8.915093000  | 0.259250000  |
| H | 4.726239000  | 9.690267000  | 2.232827000  |
| H | 2.700654000  | 9.987281000  | 5.141495000  |
| H | 6.158879000  | 12.278061000 | 6.309107000  |
| H | 6.035775000  | 13.544170000 | 4.166110000  |
| H | 4.231206000  | 13.069416000 | 2.543196000  |
| H | 4.470495000  | 10.519295000 | 6.805780000  |
| H | 2.696195000  | 8.230153000  | 2.726882000  |
| H | 1.329292000  | 6.354251000  | 3.599290000  |
| H | -0.994988000 | 6.767550000  | 4.387383000  |
| H | -1.938972000 | 9.068545000  | 4.326900000  |
| H | -0.556570000 | 10.961973000 | 3.487555000  |
| H | 6.792577000  | 15.719696000 | -1.525162000 |
| H | 8.885328000  | 14.898086000 | -0.476334000 |
| H | 8.843299000  | 12.886779000 | 0.988351000  |
| H | 6.687367000  | 11.698179000 | 1.401474000  |
| H | 4.603213000  | 12.503141000 | 0.333068000  |

141

[AsAu4 (PPh3)4]+ Tetrahedro

|    |              |              |              |
|----|--------------|--------------|--------------|
| Au | 12.074520000 | 11.949428000 | 5.726684000  |
| Au | 8.285450000  | 11.990409000 | 4.469078000  |
| Au | 9.552482000  | 9.151104000  | 7.078340000  |
| Au | 10.730415000 | 9.058389000  | 3.262715000  |
| P  | 11.210517000 | 7.634550000  | 1.529672000  |
| C  | 9.937870000  | 6.349524000  | 1.316382000  |
| C  | 9.644556000  | 5.807420000  | 0.057876000  |
| C  | 8.669507000  | 4.816675000  | -0.062743000 |
| C  | 7.984452000  | 4.367424000  | 1.068235000  |
| C  | 8.271889000  | 4.910264000  | 2.324201000  |
| C  | 9.243161000  | 5.902127000  | 2.450831000  |
| C  | 12.783848000 | 6.739544000  | 1.735488000  |
| C  | 13.878691000 | 7.444373000  | 2.260668000  |
| C  | 15.106410000 | 6.803917000  | 2.417311000  |
| C  | 15.245854000 | 5.458356000  | 2.063716000  |
| C  | 14.155877000 | 4.754383000  | 1.549990000  |
| C  | 12.924952000 | 5.391386000  | 1.384046000  |
| C  | 11.338001000 | 8.442734000  | -0.097617000 |
| C  | 12.265511000 | 8.025772000  | -1.060876000 |
| C  | 12.299338000 | 8.650260000  | -2.309192000 |
| C  | 11.411714000 | 9.687422000  | -2.597509000 |
| C  | 10.488904000 | 10.108329000 | -1.634661000 |
| C  | 10.452866000 | 9.493161000  | -0.384959000 |
| H  | 10.169667000 | 6.169306000  | -0.824987000 |
| H  | 8.437114000  | 4.404010000  | -1.043120000 |
| H  | 7.215820000  | 3.602384000  | 0.968705000  |
| H  | 7.728549000  | 4.569632000  | 3.204018000  |
| H  | 9.457209000  | 6.347840000  | 3.423542000  |
| H  | 13.757358000 | 8.489035000  | 2.549191000  |
| H  | 15.955384000 | 7.349971000  | 2.826208000  |
| H  | 16.203561000 | 4.957392000  | 2.196425000  |
| H  | 14.259168000 | 3.704968000  | 1.279487000  |
| H  | 12.071744000 | 4.839757000  | 0.989448000  |
| H  | 12.961572000 | 7.219245000  | -0.833000000 |

|   |              |              |              |
|---|--------------|--------------|--------------|
| H | 13.025070000 | 8.327032000  | -3.054304000 |
| H | 11.443972000 | 10.174219000 | -3.571421000 |
| H | 9.802097000  | 10.922948000 | -1.857044000 |
| H | 9.745340000  | 9.824475000  | 0.376574000  |
| P | 8.985244000  | 7.760466000  | 8.813623000  |
| C | 10.218565000 | 6.466635000  | 9.163594000  |
| C | 10.402104000 | 5.962777000  | 10.457489000 |
| C | 11.323576000 | 4.939155000  | 10.681015000 |
| C | 12.065172000 | 4.419187000  | 9.618450000  |
| C | 11.889844000 | 4.925911000  | 8.327999000  |
| C | 10.972340000 | 5.951058000  | 8.098402000  |
| C | 7.440037000  | 6.854796000  | 8.473281000  |
| C | 6.444714000  | 7.498945000  | 7.721573000  |
| C | 5.259148000  | 6.831119000  | 7.420140000  |
| C | 5.062531000  | 5.518635000  | 7.860798000  |
| C | 6.051933000  | 4.875963000  | 8.607853000  |
| C | 7.240891000  | 5.539929000  | 8.913045000  |
| C | 8.739891000  | 8.595305000  | 10.412796000 |
| C | 7.742891000  | 8.200786000  | 11.312679000 |
| C | 7.635512000  | 8.835273000  | 12.551653000 |
| C | 8.518544000  | 9.861301000  | 12.893569000 |
| C | 9.508560000  | 10.261403000 | 11.991688000 |
| C | 9.618668000  | 9.635879000  | 10.751767000 |
| H | 9.829993000  | 6.373897000  | 11.288369000 |
| H | 11.466152000 | 4.552357000  | 11.689018000 |
| H | 12.788446000 | 3.624649000  | 9.798192000  |
| H | 12.476995000 | 4.528009000  | 7.501597000  |
| H | 10.841978000 | 6.364009000  | 7.097458000  |
| H | 6.616684000  | 8.515297000  | 7.363145000  |
| H | 4.491459000  | 7.328743000  | 6.828653000  |
| H | 4.141172000  | 4.993199000  | 7.614215000  |
| H | 5.903245000  | 3.851124000  | 8.948503000  |
| H | 8.019826000  | 5.032070000  | 9.480366000  |
| H | 7.051515000  | 7.403386000  | 11.042297000 |
| H | 6.857085000  | 8.529690000  | 13.248401000 |
| H | 8.428602000  | 10.356152000 | 13.859219000 |
| H | 10.190477000 | 11.067998000 | 12.252756000 |
| H | 10.380866000 | 9.951167000  | 10.038908000 |
| P | 13.861575000 | 13.271167000 | 6.301564000  |
| C | 15.332955000 | 12.971777000 | 5.271928000  |
| C | 16.316817000 | 13.951252000 | 5.084798000  |
| C | 17.452327000 | 13.660111000 | 4.329582000  |
| C | 17.606974000 | 12.395559000 | 3.754288000  |
| C | 16.624039000 | 11.419297000 | 3.933908000  |
| C | 15.487525000 | 11.704170000 | 4.690196000  |
| C | 14.442123000 | 13.065977000 | 8.017002000  |
| C | 13.485771000 | 13.108656000 | 9.044562000  |
| C | 13.883139000 | 12.961971000 | 10.371777000 |
| C | 15.232822000 | 12.761433000 | 10.682562000 |
| C | 16.182505000 | 12.708124000 | 9.661925000  |
| C | 15.791049000 | 12.859299000 | 8.329646000  |
| C | 13.478122000 | 15.047191000 | 6.160824000  |
| C | 14.101175000 | 16.003562000 | 6.974364000  |
| C | 13.782167000 | 17.353466000 | 6.828749000  |
| C | 12.842056000 | 17.752399000 | 5.874887000  |
| C | 12.213136000 | 16.800221000 | 5.067901000  |
| C | 12.524575000 | 15.449010000 | 5.212516000  |
| H | 16.190567000 | 14.939626000 | 5.524513000  |
| H | 18.214861000 | 14.424358000 | 4.185481000  |
| H | 18.491946000 | 12.174596000 | 3.158485000  |
| H | 16.739125000 | 10.437935000 | 3.476298000  |
| H | 14.707692000 | 10.953677000 | 4.828919000  |
| H | 12.433485000 | 13.255012000 | 8.796814000  |
| H | 13.139361000 | 12.998729000 | 11.167607000 |
| H | 15.541929000 | 12.640202000 | 11.720168000 |
| H | 17.233284000 | 12.544069000 | 9.898516000  |
| H | 16.533737000 | 12.812678000 | 7.534759000  |
| H | 14.821956000 | 15.688761000 | 7.728946000  |

|                        |              |              |              |
|------------------------|--------------|--------------|--------------|
| H                      | 14.265539000 | 18.093592000 | 7.464753000  |
| H                      | 12.595346000 | 18.807380000 | 5.765407000  |
| H                      | 11.473358000 | 17.107685000 | 4.330425000  |
| H                      | 12.023869000 | 14.696264000 | 4.601687000  |
| P                      | 6.545099000  | 13.386117000 | 3.917833000  |
| C                      | 5.060447000  | 13.058541000 | 4.918850000  |
| C                      | 4.191117000  | 14.076082000 | 5.329967000  |
| C                      | 3.042728000  | 13.758426000 | 6.057056000  |
| C                      | 2.761689000  | 12.428970000 | 6.378038000  |
| C                      | 3.633715000  | 11.412985000 | 5.977449000  |
| C                      | 4.783186000  | 11.724280000 | 5.253390000  |
| C                      | 5.967954000  | 13.291167000 | 2.191033000  |
| C                      | 6.932861000  | 13.257996000 | 1.171752000  |
| C                      | 6.533431000  | 13.205740000 | -0.161731000 |
| C                      | 5.173519000  | 13.175784000 | -0.486854000 |
| C                      | 4.213482000  | 13.201106000 | 0.525251000  |
| C                      | 4.606624000  | 13.258349000 | 1.863558000  |
| C                      | 6.962390000  | 15.142788000 | 4.164726000  |
| C                      | 6.283169000  | 16.161022000 | 3.480134000  |
| C                      | 6.629973000  | 17.495262000 | 3.695933000  |
| C                      | 7.658606000  | 17.817050000 | 4.585408000  |
| C                      | 8.342755000  | 16.804283000 | 5.262832000  |
| C                      | 7.997636000  | 15.468936000 | 5.053751000  |
| H                      | 4.413889000  | 15.114424000 | 5.088955000  |
| H                      | 2.369671000  | 14.552839000 | 6.377464000  |
| H                      | 1.868045000  | 12.185442000 | 6.951518000  |
| H                      | 3.421057000  | 10.377173000 | 6.238680000  |
| H                      | 5.476495000  | 10.939146000 | 4.948605000  |
| H                      | 7.992944000  | 13.267629000 | 1.430831000  |
| H                      | 7.282842000  | 13.183247000 | -0.951966000 |
| H                      | 4.863126000  | 13.126329000 | -1.529661000 |
| H                      | 3.153916000  | 13.172091000 | 0.275489000  |
| H                      | 3.857348000  | 13.269928000 | 2.653435000  |
| H                      | 5.496785000  | 15.907353000 | 2.768989000  |
| H                      | 6.102894000  | 18.284307000 | 3.161843000  |
| H                      | 7.932792000  | 18.859946000 | 4.743331000  |
| H                      | 9.152163000  | 17.051261000 | 5.947985000  |
| H                      | 8.536475000  | 14.670232000 | 5.565296000  |
| As                     | 10.151463000 | 10.542107000 | 5.141028000  |
| 141                    |              |              |              |
| [AsAu4(PPh3)4]+ Planar |              |              |              |
| Au                     | 1.465575000  | 16.837263000 | 1.937859000  |
| Au                     | 2.191000000  | 14.841377000 | -0.000474000 |
| Au                     | 0.944489000  | 13.022636000 | 1.790143000  |
| Au                     | -0.105746000 | 15.003083000 | 3.514122000  |
| As                     | -0.203658000 | 15.166081000 | 0.952305000  |
| P                      | 2.990037000  | 18.344391000 | 2.768372000  |
| C                      | 2.562582000  | 19.105896000 | 4.364248000  |
| C                      | 1.740244000  | 18.375576000 | 5.232854000  |
| C                      | 1.471165000  | 18.859175000 | 6.511366000  |
| C                      | 2.006272000  | 20.082424000 | 6.919367000  |
| C                      | 2.802457000  | 20.827456000 | 6.045365000  |
| C                      | 3.082430000  | 20.343218000 | 4.767471000  |
| C                      | 3.340767000  | 19.748709000 | 1.658004000  |
| C                      | 2.264228000  | 20.283051000 | 0.932986000  |
| C                      | 2.453218000  | 21.400768000 | 0.122842000  |
| C                      | 3.717767000  | 21.987217000 | 0.024160000  |
| C                      | 4.795118000  | 21.445779000 | 0.727922000  |
| C                      | 4.610656000  | 20.326855000 | 1.542154000  |
| C                      | 4.599863000  | 17.540113000 | 3.068102000  |
| C                      | 4.902878000  | 16.370890000 | 2.356270000  |
| C                      | 6.120497000  | 15.727037000 | 2.559639000  |
| C                      | 7.041356000  | 16.243065000 | 3.474386000  |
| C                      | 6.739563000  | 17.401416000 | 4.194220000  |
| C                      | 5.519671000  | 18.047331000 | 3.996500000  |
| P                      | 4.026143000  | 14.698224000 | -1.371896000 |
| C                      | 5.602267000  | 14.146256000 | -0.640515000 |
| C                      | 5.591197000  | 12.992032000 | 0.156037000  |



|   |              |              |              |
|---|--------------|--------------|--------------|
| C | 6.771182000  | 12.536003000 | 0.739440000  |
| C | 7.968922000  | 13.226437000 | 0.529271000  |
| C | 7.981366000  | 14.376562000 | -0.262027000 |
| C | 6.801065000  | 14.841609000 | -0.844401000 |
| C | 4.404352000  | 16.311322000 | -2.118738000 |
| C | 4.912192000  | 16.429735000 | -3.419523000 |
| C | 5.219441000  | 17.691264000 | -3.930045000 |
| C | 5.025006000  | 18.831159000 | -3.145289000 |
| C | 4.514436000  | 18.714695000 | -1.849741000 |
| C | 4.196896000  | 17.459027000 | -1.337873000 |
| C | 3.731958000  | 13.547242000 | -2.753795000 |
| C | 2.411546000  | 13.360916000 | -3.190073000 |
| C | 2.141560000  | 12.495030000 | -4.247982000 |
| C | 3.186521000  | 11.807265000 | -4.871982000 |
| C | 4.501387000  | 11.987666000 | -4.435973000 |
| C | 4.776660000  | 12.854328000 | -3.377728000 |
| P | 2.095605000  | 11.151267000 | 2.436167000  |
| C | 3.096203000  | 10.517121000 | 1.048961000  |
| C | 2.639139000  | 10.751514000 | -0.257035000 |
| C | 3.385717000  | 10.312365000 | -1.348521000 |
| C | 4.594722000  | 9.645200000  | -1.143136000 |
| C | 5.054815000  | 9.409970000  | 0.154941000  |
| C | 4.311061000  | 9.845533000  | 1.250889000  |
| C | 1.125401000  | 9.753562000  | 3.072707000  |
| C | 1.655896000  | 8.456699000  | 3.130346000  |
| C | 0.886284000  | 7.413880000  | 3.642254000  |
| C | -0.417597000 | 7.657843000  | 4.083814000  |
| C | -0.949305000 | 8.946140000  | 4.019628000  |
| C | -0.179770000 | 9.997669000  | 3.519538000  |
| C | 3.345535000  | 11.507396000 | 3.710508000  |
| C | 3.406468000  | 10.806727000 | 4.919489000  |
| C | 4.413741000  | 11.098002000 | 5.842018000  |
| C | 5.369378000  | 12.071413000 | 5.551762000  |
| C | 5.303373000  | 12.777281000 | 4.346737000  |
| C | 4.284046000  | 12.515542000 | 3.437992000  |
| P | 0.032574000  | 14.694692000 | 5.780395000  |
| C | -0.316989000 | 12.988852000 | 6.307685000  |
| C | -1.635114000 | 12.514574000 | 6.204415000  |
| C | -1.935262000 | 11.210951000 | 6.588729000  |
| C | -0.922163000 | 10.365827000 | 7.054502000  |
| C | 0.390884000  | 10.827248000 | 7.129249000  |
| C | 0.698564000  | 12.138041000 | 6.758480000  |
| C | -1.061026000 | 15.732885000 | 6.797664000  |
| C | -1.477006000 | 16.965467000 | 6.274603000  |
| C | -2.258219000 | 17.823561000 | 7.047458000  |
| C | -2.635279000 | 17.449828000 | 8.339385000  |
| C | -2.235331000 | 16.215072000 | 8.858021000  |
| C | -1.450098000 | 15.355676000 | 8.091130000  |
| C | 1.718828000  | 15.065255000 | 6.355520000  |
| C | 1.979159000  | 15.382570000 | 7.696277000  |
| C | 3.269981000  | 15.728801000 | 8.090805000  |
| C | 4.302015000  | 15.761699000 | 7.149802000  |
| C | 4.046665000  | 15.435128000 | 5.817834000  |
| C | 2.759575000  | 15.086407000 | 5.416640000  |
| H | 2.550393000  | 14.851328000 | 4.371614000  |
| H | 4.848301000  | 15.462123000 | 5.084352000  |
| H | 5.307216000  | 16.050748000 | 7.455275000  |
| H | 3.467180000  | 15.984637000 | 9.130930000  |
| H | 1.171118000  | 15.377209000 | 8.425886000  |
| H | 1.723355000  | 12.501689000 | 6.821484000  |
| H | 1.181231000  | 10.166864000 | 7.482800000  |
| H | -1.158122000 | 9.344685000  | 7.350152000  |
| H | -2.960882000 | 10.851895000 | 6.523277000  |
| H | -2.422617000 | 13.173589000 | 5.837275000  |
| H | -1.149507000 | 14.386230000 | 8.487649000  |
| H | -2.540175000 | 15.918290000 | 9.860266000  |
| H | -3.254037000 | 18.115571000 | 8.939264000  |
| H | -2.580287000 | 18.778798000 | 6.636448000  |

|   |              |              |              |
|---|--------------|--------------|--------------|
| H | -1.188749000 | 17.242084000 | 5.259498000  |
| H | 7.992861000  | 15.736243000 | 3.630806000  |
| H | 6.346587000  | 14.817253000 | 2.008115000  |
| H | 4.169830000  | 15.953675000 | 1.661730000  |
| H | 7.450961000  | 17.799779000 | 4.916851000  |
| H | 5.270615000  | 18.931500000 | 4.581393000  |
| H | 1.317880000  | 17.429286000 | 4.895443000  |
| H | 0.837866000  | 18.283078000 | 7.183966000  |
| H | 1.791858000  | 20.462513000 | 7.917506000  |
| H | 3.203720000  | 21.790401000 | 6.357025000  |
| H | 3.694847000  | 20.928770000 | 4.082313000  |
| H | 5.455292000  | 19.898731000 | 2.079843000  |
| H | 5.784300000  | 21.891304000 | 0.639887000  |
| H | 3.864726000  | 22.859480000 | -0.611567000 |
| H | 1.614858000  | 21.810555000 | -0.437395000 |
| H | 1.282341000  | 19.813404000 | 1.003877000  |
| H | 3.770705000  | 17.366729000 | -0.337870000 |
| H | 4.349736000  | 19.601579000 | -1.240981000 |
| H | 5.261191000  | 19.815339000 | -3.549011000 |
| H | 5.605756000  | 17.783399000 | -4.943992000 |
| H | 5.056593000  | 15.540442000 | -4.032474000 |
| H | 5.800251000  | 12.983261000 | -3.027569000 |
| H | 5.315656000  | 11.449882000 | -4.918990000 |
| H | 2.974101000  | 11.127040000 | -5.695784000 |
| H | 1.114996000  | 12.351634000 | -4.581895000 |
| H | 1.600330000  | 13.888848000 | -2.686190000 |
| H | 1.708913000  | 11.301024000 | -0.408332000 |
| H | 3.029994000  | 10.505354000 | -2.359151000 |
| H | 5.184446000  | 9.315034000  | -1.997339000 |
| H | 6.000835000  | 8.894209000  | 0.313589000  |
| H | 4.683250000  | 9.688281000  | 2.263140000  |
| H | 2.669130000  | 10.036019000 | 5.134980000  |
| H | 6.160830000  | 12.289511000 | 6.267551000  |
| H | 6.036554000  | 13.548091000 | 4.122422000  |
| H | 4.214619000  | 13.087573000 | 2.512553000  |
| H | 4.455551000  | 10.554529000 | 6.784943000  |
| H | 2.663001000  | 8.262785000  | 2.765570000  |
| H | 1.297772000  | 6.406640000  | 3.682942000  |
| H | -1.022271000 | 6.836940000  | 4.467879000  |
| H | -1.967684000 | 9.134552000  | 4.353157000  |
| H | -0.585337000 | 11.009340000 | 3.467939000  |
| H | 6.809822000  | 15.745545000 | -1.451806000 |
| H | 8.910220000  | 14.920538000 | -0.424928000 |
| H | 8.891517000  | 12.869728000 | 0.985831000  |
| H | 6.748753000  | 11.644938000 | 1.363606000  |
| H | 4.657294000  | 12.452610000 | 0.314437000  |

141

[SbAu4 (PPh3)4]+ Tetrahedro

|    |              |              |              |
|----|--------------|--------------|--------------|
| Au | 12.248411000 | 12.024036000 | 5.798302000  |
| Au | 8.194126000  | 12.090095000 | 4.503310000  |
| Au | 9.513729000  | 9.023177000  | 7.239927000  |
| Au | 10.756646000 | 8.946529000  | 3.181946000  |
| P  | 11.218259000 | 7.542338000  | 1.407720000  |
| C  | 9.970393000  | 6.235541000  | 1.181012000  |
| C  | 9.612503000  | 5.770913000  | -0.091588000 |
| C  | 8.661214000  | 4.758715000  | -0.219751000 |
| C  | 8.067926000  | 4.207343000  | 0.918188000  |
| C  | 8.420844000  | 4.671353000  | 2.188880000  |
| C  | 9.366018000  | 5.687044000  | 2.323047000  |
| C  | 12.808988000 | 6.666188000  | 1.551611000  |
| C  | 13.924472000 | 7.389621000  | 2.003371000  |
| C  | 15.162184000 | 6.758856000  | 2.115580000  |
| C  | 15.290808000 | 5.403853000  | 1.793533000  |
| C  | 14.180274000 | 4.681857000  | 1.353578000  |
| C  | 12.939346000 | 5.309674000  | 1.230467000  |
| C  | 11.290297000 | 8.398182000  | -0.197494000 |
| C  | 12.147309000 | 7.974016000  | -1.221109000 |
| C  | 12.127557000 | 8.622603000  | -2.456853000 |

|   |              |              |               |
|---|--------------|--------------|---------------|
| C | 11.257556000 | 9.693896000  | -2.671488000  |
| C | 10.408605000 | 10.124041000 | -1.647919000  |
| C | 10.424435000 | 9.481941000  | -0.4111073000 |
| H | 10.069083000 | 6.208174000  | -0.979657000  |
| H | 8.378747000  | 4.406116000  | -1.211061000  |
| H | 7.320648000  | 3.421788000  | 0.813926000   |
| H | 7.948455000  | 4.250821000  | 3.075670000   |
| H | 9.630870000  | 6.071069000  | 3.309824000   |
| H | 13.813428000 | 8.441897000  | 2.269638000   |
| H | 16.027942000 | 7.321100000  | 2.463169000   |
| H | 16.256343000 | 4.908949000  | 1.891466000   |
| H | 14.277368000 | 3.625237000  | 1.105903000   |
| H | 12.071390000 | 4.745911000  | 0.890381000   |
| H | 12.828725000 | 7.141184000  | -1.049191000  |
| H | 12.795286000 | 8.291991000  | -3.251796000  |
| H | 11.248214000 | 10.200776000 | -3.635603000  |
| H | 9.739028000  | 10.967131000 | -1.812492000  |
| H | 9.773814000  | 9.817777000  | 0.397446000   |
| P | 8.903532000  | 7.622258000  | 8.968842000   |
| C | 10.112249000 | 6.305788000  | 9.313726000   |
| C | 10.317596000 | 5.807369000  | 10.606411000  |
| C | 11.222515000 | 4.765364000  | 10.813646000  |
| C | 11.922444000 | 4.220629000  | 9.735287000   |
| C | 11.724811000 | 4.721225000  | 8.445342000   |
| C | 10.825498000 | 5.765295000  | 8.232656000   |
| C | 7.347509000  | 6.742277000  | 8.618237000   |
| C | 6.329070000  | 7.443748000  | 7.954153000   |
| C | 5.126590000  | 6.806316000  | 7.655619000   |
| C | 4.937699000  | 5.466177000  | 8.007013000   |
| C | 5.951460000  | 4.765800000  | 8.662553000   |
| C | 7.156503000  | 5.400492000  | 8.969521000   |
| C | 8.638939000  | 8.473161000  | 10.554900000  |
| C | 7.717905000  | 8.003337000  | 11.500251000  |
| C | 7.573975000  | 8.667370000  | 12.719387000  |
| C | 8.341768000  | 9.801132000  | 12.995283000  |
| C | 9.254027000  | 10.276264000 | 12.049579000  |
| C | 9.401960000  | 9.618178000  | 10.829398000  |
| H | 9.777010000  | 6.237652000  | 11.448263000  |
| H | 11.384125000 | 4.383831000  | 11.820484000  |
| H | 12.632675000 | 3.410748000  | 9.901488000   |
| H | 12.281535000 | 4.305829000  | 7.606466000   |
| H | 10.678284000 | 6.174598000  | 7.232408000   |
| H | 6.492907000  | 8.482467000  | 7.663912000   |
| H | 4.339156000  | 7.350127000  | 7.136326000   |
| H | 4.001856000  | 4.965318000  | 7.761091000   |
| H | 5.810170000  | 3.720114000  | 8.931058000   |
| H | 7.952147000  | 4.850762000  | 9.471137000   |
| H | 7.109487000  | 7.126461000  | 11.277684000  |
| H | 6.855179000  | 8.302839000  | 13.451220000  |
| H | 8.219942000  | 10.322208000 | 13.944496000  |
| H | 9.843077000  | 11.168265000 | 12.259061000  |
| H | 10.099370000 | 9.991373000  | 10.077927000  |
| P | 14.055625000 | 13.355296000 | 6.347528000   |
| C | 15.557373000 | 12.913955000 | 5.418093000   |
| C | 16.540727000 | 13.855531000 | 5.089547000   |
| C | 17.696156000 | 13.448969000 | 4.422440000   |
| C | 17.870659000 | 12.106828000 | 4.076452000   |
| C | 16.885090000 | 11.168019000 | 4.391568000   |
| C | 15.729096000 | 11.567878000 | 5.058414000   |
| C | 14.554670000 | 13.302221000 | 8.099221000   |
| C | 13.544179000 | 13.227906000 | 9.070348000   |
| C | 13.877212000 | 13.239046000 | 10.423084000  |
| C | 15.217015000 | 13.316701000 | 10.813538000  |
| C | 16.223760000 | 13.379510000 | 9.849476000   |
| C | 15.896540000 | 13.370022000 | 8.492694000   |
| C | 13.737681000 | 15.120698000 | 6.021365000   |
| C | 14.379651000 | 16.134856000 | 6.744786000   |
| C | 14.091335000 | 17.472070000 | 6.472100000   |

|                         |              |              |              |
|-------------------------|--------------|--------------|--------------|
| C                       | 13.158968000 | 17.801914000 | 5.485306000  |
| C                       | 12.512055000 | 16.793239000 | 4.767015000  |
| C                       | 12.797694000 | 15.455018000 | 5.034129000  |
| H                       | 16.400289000 | 14.903985000 | 5.349900000  |
| H                       | 18.458820000 | 14.182974000 | 4.167779000  |
| H                       | 18.772244000 | 11.793039000 | 3.552236000  |
| H                       | 17.014393000 | 10.123232000 | 4.110593000  |
| H                       | 14.948380000 | 10.844458000 | 5.298190000  |
| H                       | 12.501873000 | 13.156216000 | 8.758035000  |
| H                       | 13.092702000 | 13.178093000 | 11.175129000 |
| H                       | 15.476822000 | 13.317223000 | 11.871751000 |
| H                       | 17.268474000 | 13.429118000 | 10.150834000 |
| H                       | 16.683728000 | 13.406863000 | 7.740954000  |
| H                       | 15.087642000 | 15.877807000 | 7.532451000  |
| H                       | 14.588193000 | 18.256960000 | 7.039349000  |
| H                       | 12.929522000 | 18.847357000 | 5.281952000  |
| H                       | 11.775682000 | 17.047769000 | 4.006273000  |
| H                       | 12.282316000 | 14.660326000 | 4.493262000  |
| P                       | 6.451566000  | 13.495399000 | 3.936308000  |
| C                       | 4.958809000  | 13.201087000 | 4.937192000  |
| C                       | 4.066392000  | 14.224041000 | 5.280544000  |
| C                       | 2.914747000  | 13.924967000 | 6.009207000  |
| C                       | 2.653311000  | 12.609735000 | 6.399999000  |
| C                       | 3.547093000  | 11.588754000 | 6.067143000  |
| C                       | 4.699548000  | 11.881281000 | 5.340705000  |
| C                       | 5.889515000  | 13.352108000 | 2.208552000  |
| C                       | 6.864948000  | 13.188884000 | 1.212200000  |
| C                       | 6.485526000  | 13.100708000 | -0.125137000 |
| C                       | 5.133826000  | 13.168513000 | -0.475306000 |
| C                       | 4.161743000  | 13.321755000 | 0.514824000  |
| C                       | 4.535911000  | 13.411471000 | 1.856669000  |
| C                       | 6.891838000  | 15.251628000 | 4.138724000  |
| C                       | 6.225960000  | 16.266432000 | 3.437352000  |
| C                       | 6.602955000  | 17.597008000 | 3.617497000  |
| C                       | 7.650915000  | 17.917411000 | 4.485834000  |
| C                       | 8.323496000  | 16.907768000 | 5.177494000  |
| C                       | 7.945591000  | 15.576576000 | 5.007326000  |
| H                       | 4.274676000  | 15.252370000 | 4.986605000  |
| H                       | 2.223763000  | 14.722558000 | 6.277532000  |
| H                       | 1.758108000  | 12.381955000 | 6.976382000  |
| H                       | 3.351733000  | 10.565698000 | 6.385486000  |
| H                       | 5.413164000  | 11.094595000 | 5.091118000  |
| H                       | 7.916622000  | 13.123870000 | 1.494675000  |
| H                       | 7.243248000  | 12.972302000 | -0.897175000 |
| H                       | 4.837703000  | 13.092756000 | -1.521075000 |
| H                       | 3.107423000  | 13.364676000 | 0.245786000  |
| H                       | 3.775709000  | 13.518290000 | 2.629966000  |
| H                       | 5.429041000  | 16.013163000 | 2.738054000  |
| H                       | 6.085071000  | 18.384466000 | 3.071499000  |
| H                       | 7.949319000  | 18.957013000 | 4.615846000  |
| H                       | 9.148722000  | 17.154781000 | 5.844200000  |
| H                       | 8.474831000  | 14.778194000 | 5.530439000  |
| Sb                      | 10.180671000 | 10.529162000 | 5.197961000  |
| 141                     |              |              |              |
| [SbAu4 (PPh3)4]+ Planar |              |              |              |
| Au                      | 1.417714000  | 16.858934000 | 1.902728000  |
| Au                      | 2.217164000  | 14.830245000 | -0.016037000 |
| Au                      | 0.922411000  | 13.046711000 | 1.785294000  |
| Au                      | -0.210477000 | 15.028832000 | 3.488431000  |
| Sb                      | -0.413772000 | 15.208627000 | 0.770642000  |
| P                       | 2.975670000  | 18.328278000 | 2.763375000  |
| C                       | 2.547051000  | 19.074034000 | 4.365694000  |
| C                       | 1.752752000  | 18.316442000 | 5.237938000  |
| C                       | 1.491266000  | 18.780162000 | 6.525246000  |
| C                       | 2.001793000  | 20.013135000 | 6.936870000  |
| C                       | 2.765980000  | 20.786844000 | 6.058292000  |
| C                       | 3.042590000  | 20.320562000 | 4.772632000  |
| C                       | 3.326788000  | 19.737750000 | 1.659935000  |

|   |              |              |              |
|---|--------------|--------------|--------------|
| C | 2.246881000  | 20.288240000 | 0.951742000  |
| C | 2.440644000  | 21.400790000 | 0.136140000  |
| C | 3.713308000  | 21.965663000 | 0.014882000  |
| C | 4.792928000  | 21.409643000 | 0.703673000  |
| C | 4.603870000  | 20.295772000 | 1.523715000  |
| C | 4.584710000  | 17.522022000 | 3.056641000  |
| C | 4.897076000  | 16.370490000 | 2.319712000  |
| C | 6.114786000  | 15.725693000 | 2.518650000  |
| C | 7.024968000  | 16.221496000 | 3.454872000  |
| C | 6.712738000  | 17.360865000 | 4.200564000  |
| C | 5.493372000  | 18.009013000 | 4.006232000  |
| P | 4.069161000  | 14.687658000 | -1.379271000 |
| C | 5.658274000  | 14.147632000 | -0.667909000 |
| C | 5.673232000  | 12.971056000 | 0.095946000  |
| C | 6.858603000  | 12.534943000 | 0.682777000  |
| C | 8.037191000  | 13.267051000 | 0.508428000  |
| C | 8.025129000  | 14.437402000 | -0.252843000 |
| C | 6.838430000  | 14.882884000 | -0.838480000 |
| C | 4.423106000  | 16.303689000 | -2.132564000 |
| C | 4.943091000  | 16.421589000 | -3.429208000 |
| C | 5.228513000  | 17.684589000 | -3.948941000 |
| C | 4.999938000  | 18.826934000 | -3.177289000 |
| C | 4.477565000  | 18.710969000 | -1.885922000 |
| C | 4.182233000  | 17.453430000 | -1.365004000 |
| C | 3.760285000  | 13.535627000 | -2.757043000 |
| C | 2.435987000  | 13.363874000 | -3.188577000 |
| C | 2.151877000  | 12.498144000 | -4.242507000 |
| C | 3.186329000  | 11.794104000 | -4.866349000 |
| C | 4.504721000  | 11.960768000 | -4.436064000 |
| C | 4.794711000  | 12.828997000 | -3.382656000 |
| P | 2.134253000  | 11.221058000 | 2.483379000  |
| C | 3.119245000  | 10.565063000 | 1.093418000  |
| C | 2.657617000  | 10.796404000 | -0.211693000 |
| C | 3.388456000  | 10.335623000 | -1.305202000 |
| C | 4.585930000  | 9.647688000  | -1.103181000 |
| C | 5.050157000  | 9.414030000  | 0.193904000  |
| C | 4.322342000  | 9.871687000  | 1.291516000  |
| C | 1.160817000  | 9.838503000  | 3.152554000  |
| C | 1.726882000  | 8.570139000  | 3.354180000  |
| C | 0.949116000  | 7.537726000  | 3.873545000  |
| C | -0.397236000 | 7.762030000  | 4.180660000  |
| C | -0.962796000 | 9.021384000  | 3.976354000  |
| C | -0.185961000 | 10.063336000 | 3.467823000  |
| C | 3.398501000  | 11.589137000 | 3.739550000  |
| C | 3.379068000  | 11.011596000 | 5.013541000  |
| C | 4.390901000  | 11.311416000 | 5.928162000  |
| C | 5.430809000  | 12.168255000 | 5.567752000  |
| C | 5.443696000  | 12.754330000 | 4.298670000  |
| C | 4.420625000  | 12.488445000 | 3.395695000  |
| P | -0.003081000 | 14.673287000 | 5.750614000  |
| C | -0.398803000 | 12.974831000 | 6.269538000  |
| C | -1.722177000 | 12.526490000 | 6.118553000  |
| C | -2.068753000 | 11.239155000 | 6.517254000  |
| C | -1.095684000 | 10.382523000 | 7.043702000  |
| C | 0.223465000  | 10.817340000 | 7.167497000  |
| C | 0.575839000  | 12.113659000 | 6.784832000  |
| C | -1.053277000 | 15.723823000 | 6.801356000  |
| C | -1.462059000 | 16.967313000 | 6.299200000  |
| C | -2.218794000 | 17.826962000 | 7.094549000  |
| C | -2.578314000 | 17.444012000 | 8.388377000  |
| C | -2.186025000 | 16.197773000 | 8.886563000  |
| C | -1.427178000 | 15.336212000 | 8.095836000  |
| C | 1.703997000  | 14.984527000 | 6.296631000  |
| C | 2.005756000  | 15.241016000 | 7.641321000  |
| C | 3.314705000  | 15.540366000 | 8.015188000  |
| C | 4.322564000  | 15.591215000 | 7.049299000  |
| C | 4.025275000  | 15.329621000 | 5.712117000  |
| C | 2.721006000  | 15.022988000 | 5.331890000  |

|                            |              |              |              |
|----------------------------|--------------|--------------|--------------|
| H                          | 2.480400000  | 14.836690000 | 4.283607000  |
| H                          | 4.807263000  | 15.371008000 | 4.958595000  |
| H                          | 5.342289000  | 15.843608000 | 7.339571000  |
| H                          | 3.544470000  | 15.746997000 | 9.059720000  |
| H                          | 1.216377000  | 15.224255000 | 8.391043000  |
| H                          | 1.603718000  | 12.459998000 | 6.887290000  |
| H                          | 0.982019000  | 10.147903000 | 7.570890000  |
| H                          | -1.367368000 | 9.373286000  | 7.349788000  |
| H                          | -3.099030000 | 10.900738000 | 6.414716000  |
| H                          | -2.477855000 | 13.194236000 | 5.703041000  |
| H                          | -1.136692000 | 14.356679000 | 8.474981000  |
| H                          | -2.479075000 | 15.892599000 | 9.890141000  |
| H                          | -3.177357000 | 18.111603000 | 9.006467000  |
| H                          | -2.534043000 | 18.791489000 | 6.699845000  |
| H                          | -1.187065000 | 17.252101000 | 5.282952000  |
| H                          | 7.975973000  | 15.712460000 | 3.608951000  |
| H                          | 6.348784000  | 14.829168000 | 1.949037000  |
| H                          | 4.170128000  | 15.966307000 | 1.610498000  |
| H                          | 7.415043000  | 17.742297000 | 4.940997000  |
| H                          | 5.236339000  | 18.879536000 | 4.608422000  |
| H                          | 1.346470000  | 17.364443000 | 4.896632000  |
| H                          | 0.882370000  | 18.181726000 | 7.201507000  |
| H                          | 1.793076000  | 20.378281000 | 7.941681000  |
| H                          | 3.146620000  | 21.757105000 | 6.374087000  |
| H                          | 3.634316000  | 20.925057000 | 4.085227000  |
| H                          | 5.449936000  | 19.855372000 | 2.049589000  |
| H                          | 5.787883000  | 21.838831000 | 0.598421000  |
| H                          | 3.864556000  | 22.832658000 | -0.626864000 |
| H                          | 1.599901000  | 21.822794000 | -0.411366000 |
| H                          | 1.258988000  | 19.833614000 | 1.039499000  |
| H                          | 3.747124000  | 17.361048000 | -0.368678000 |
| H                          | 4.286082000  | 19.599372000 | -1.287475000 |
| H                          | 5.218498000  | 19.812517000 | -3.587733000 |
| H                          | 5.623386000  | 17.775638000 | -4.960128000 |
| H                          | 5.114087000  | 15.530264000 | -4.032281000 |
| H                          | 5.821207000  | 12.948274000 | -3.037450000 |
| H                          | 5.310568000  | 11.411123000 | -4.920052000 |
| H                          | 2.962745000  | 11.113103000 | -5.686594000 |
| H                          | 1.122936000  | 12.367828000 | -4.574485000 |
| H                          | 1.633107000  | 13.904540000 | -2.684736000 |
| H                          | 1.736435000  | 11.361032000 | -0.361439000 |
| H                          | 3.029074000  | 10.527293000 | -2.314781000 |
| H                          | 5.163514000  | 9.300184000  | -1.958794000 |
| H                          | 5.986418000  | 8.880191000  | 0.350229000  |
| H                          | 4.699790000  | 9.716114000  | 2.301517000  |
| H                          | 2.578335000  | 10.325904000 | 5.283920000  |
| H                          | 6.225287000  | 12.389846000 | 6.279199000  |
| H                          | 6.241700000  | 13.438358000 | 4.018730000  |
| H                          | 4.416824000  | 12.969185000 | 2.417726000  |
| H                          | 4.371681000  | 10.863609000 | 6.920893000  |
| H                          | 2.769445000  | 8.389081000  | 3.096626000  |
| H                          | 1.387565000  | 6.552215000  | 4.024124000  |
| H                          | -1.006716000 | 6.947781000  | 4.571485000  |
| H                          | -2.011826000 | 9.195022000  | 4.207629000  |
| H                          | -0.618093000 | 11.053298000 | 3.306785000  |
| H                          | 6.827109000  | 15.803451000 | -1.420388000 |
| H                          | 8.939454000  | 15.013064000 | -0.387430000 |
| H                          | 8.963104000  | 12.926527000 | 0.970046000  |
| H                          | 6.855603000  | 11.626889000 | 1.282992000  |
| H                          | 4.754127000  | 12.400202000 | 0.227439000  |
| 141                        |              |              |              |
| [BiAu4(PPh3)4]+ Tetrahedro |              |              |              |
| Au                         | 12.212362000 | 11.958320000 | 5.748723000  |
| Au                         | 8.002855000  | 12.046818000 | 4.492675000  |
| Au                         | 9.368018000  | 8.813926000  | 7.279845000  |
| Au                         | 10.699722000 | 8.766182000  | 3.068230000  |
| P                          | 11.226860000 | 7.475459000  | 1.233679000  |
| C                          | 10.029021000 | 6.155242000  | 0.869958000  |

|   |              |              |              |
|---|--------------|--------------|--------------|
| C | 9.717766000  | 5.779973000  | -0.442705000 |
| C | 8.828921000  | 4.729432000  | -0.672789000 |
| C | 8.249253000  | 4.054038000  | 0.402748000  |
| C | 8.553148000  | 4.431469000  | 1.714151000  |
| C | 9.437664000  | 5.482705000  | 1.950296000  |
| C | 12.825928000 | 6.618461000  | 1.400971000  |
| C | 13.883342000 | 7.305934000  | 2.016922000  |
| C | 15.123064000 | 6.686897000  | 2.160576000  |
| C | 15.311738000 | 5.379217000  | 1.703684000  |
| C | 14.259045000 | 4.692609000  | 1.096276000  |
| C | 13.016626000 | 5.309368000  | 0.942711000  |
| C | 11.358142000 | 8.441935000  | -0.304125000 |
| C | 12.238819000 | 8.071532000  | -1.329010000 |
| C | 12.285906000 | 8.815751000  | -2.507757000 |
| C | 11.459300000 | 9.929865000  | -2.666400000 |
| C | 10.583030000 | 10.303571000 | -1.643881000 |
| C | 10.531977000 | 9.564964000  | -0.462426000 |
| H | 10.165580000 | 6.309979000  | -1.282430000 |
| H | 8.587736000  | 4.442024000  | -1.694925000 |
| H | 7.552691000  | 3.237262000  | 0.217686000  |
| H | 8.091769000  | 3.912850000  | 2.553365000  |
| H | 9.668058000  | 5.795117000  | 2.969684000  |
| H | 13.723094000 | 8.319011000  | 2.388369000  |
| H | 15.942506000 | 7.219286000  | 2.640086000  |
| H | 16.278375000 | 4.892695000  | 1.828710000  |
| H | 14.400901000 | 3.671609000  | 0.744864000  |
| H | 12.193217000 | 4.770753000  | 0.474588000  |
| H | 12.890461000 | 7.207995000  | -1.199983000 |
| H | 12.975014000 | 8.528896000  | -3.300037000 |
| H | 11.506559000 | 10.513910000 | -3.584970000 |
| H | 9.947250000  | 11.179750000 | -1.762978000 |
| H | 9.863035000  | 9.858722000  | 0.347474000  |
| P | 8.810979000  | 7.425718000  | 9.036577000  |
| C | 9.986967000  | 6.058606000  | 9.287228000  |
| C | 10.283343000 | 5.566210000  | 10.565053000 |
| C | 11.148500000 | 4.480784000  | 10.707842000 |
| C | 11.720910000 | 3.887341000  | 9.580016000  |
| C | 11.434142000 | 4.382897000  | 8.304899000  |
| C | 10.572127000 | 5.468573000  | 8.156092000  |
| C | 7.193984000  | 6.612487000  | 8.822841000  |
| C | 6.150397000  | 7.349811000  | 8.241164000  |
| C | 4.897877000  | 6.763515000  | 8.068539000  |
| C | 4.683237000  | 5.439786000  | 8.463631000  |
| C | 5.721441000  | 4.703948000  | 9.038558000  |
| C | 6.976180000  | 5.287120000  | 9.220048000  |
| C | 8.718364000  | 8.260293000  | 10.649695000 |
| C | 7.799542000  | 7.866685000  | 11.631381000 |
| C | 7.796026000  | 8.501492000  | 12.874049000 |
| C | 8.703135000  | 9.529696000  | 13.138626000 |
| C | 9.615643000  | 9.928343000  | 12.157100000 |
| C | 9.623319000  | 9.299356000  | 10.912619000 |
| H | 9.840890000  | 6.032538000  | 11.444284000 |
| H | 11.378471000 | 4.101689000  | 11.703082000 |
| H | 12.399493000 | 3.042625000  | 9.695095000  |
| H | 11.891640000 | 3.930461000  | 7.426573000  |
| H | 10.354602000 | 5.871869000  | 7.165667000  |
| H | 6.331091000  | 8.375326000  | 7.916790000  |
| H | 4.088727000  | 7.335405000  | 7.616079000  |
| H | 3.706768000  | 4.979215000  | 8.316802000  |
| H | 5.558176000  | 3.670897000  | 9.342713000  |
| H | 7.788378000  | 4.710652000  | 9.661291000  |
| H | 7.087573000  | 7.069472000  | 11.421618000 |
| H | 7.078966000  | 8.194456000  | 13.634380000 |
| H | 8.692776000  | 10.027528000 | 14.108452000 |
| H | 10.315854000 | 10.738092000 | 12.359513000 |
| H | 10.323476000 | 9.612472000  | 10.136889000 |
| P | 14.033620000 | 13.290226000 | 6.220681000  |
| C | 15.483105000 | 12.900997000 | 5.190669000  |



|    |              |              |              |
|----|--------------|--------------|--------------|
| C  | 16.383858000 | 13.884710000 | 4.764228000  |
| C  | 17.514577000 | 13.519620000 | 4.031800000  |
| C  | 17.744989000 | 12.177965000 | 3.717986000  |
| C  | 16.838800000 | 11.196802000 | 4.130043000  |
| C  | 15.708436000 | 11.554363000 | 4.863019000  |
| C  | 14.649185000 | 13.196193000 | 7.933416000  |
| C  | 13.708814000 | 13.141848000 | 8.974259000  |
| C  | 14.138881000 | 13.128631000 | 10.299827000 |
| C  | 15.505813000 | 13.160362000 | 10.593741000 |
| C  | 16.442343000 | 13.199230000 | 9.559382000  |
| C  | 16.017777000 | 13.215720000 | 8.229162000  |
| C  | 13.670059000 | 15.058401000 | 5.968658000  |
| C  | 14.358242000 | 16.058095000 | 6.671043000  |
| C  | 14.037891000 | 17.399301000 | 6.462044000  |
| C  | 13.028911000 | 17.747260000 | 5.560281000  |
| C  | 12.336332000 | 16.753160000 | 4.864114000  |
| C  | 12.653482000 | 15.410864000 | 5.067495000  |
| H  | 16.199192000 | 14.932761000 | 5.001313000  |
| H  | 18.214607000 | 14.285890000 | 3.701702000  |
| H  | 18.626409000 | 11.898579000 | 3.141976000  |
| H  | 17.011301000 | 10.152121000 | 3.875178000  |
| H  | 14.990575000 | 10.797007000 | 5.181983000  |
| H  | 12.644143000 | 13.107077000 | 8.737967000  |
| H  | 13.407719000 | 13.087379000 | 11.106010000 |
| H  | 15.839914000 | 13.147088000 | 11.630668000 |
| H  | 17.507799000 | 13.214015000 | 9.784713000  |
| H  | 16.748401000 | 13.242833000 | 7.422137000  |
| H  | 15.129468000 | 15.784988000 | 7.391247000  |
| H  | 14.570320000 | 18.172873000 | 7.012728000  |
| H  | 12.777154000 | 18.795744000 | 5.406073000  |
| H  | 11.539913000 | 17.021176000 | 4.170964000  |
| H  | 12.103552000 | 14.626803000 | 4.544392000  |
| P  | 6.367377000  | 13.623289000 | 4.081218000  |
| C  | 4.865093000  | 13.377096000 | 5.081667000  |
| C  | 4.065351000  | 14.447079000 | 5.503754000  |
| C  | 2.887689000  | 14.197960000 | 6.209126000  |
| C  | 2.508098000  | 12.885784000 | 6.499611000  |
| C  | 3.309508000  | 11.817093000 | 6.088615000  |
| C  | 4.487313000  | 12.059526000 | 5.382700000  |
| C  | 5.765365000  | 13.729627000 | 2.363658000  |
| C  | 6.720473000  | 13.748512000 | 1.334420000  |
| C  | 6.311023000  | 13.872493000 | 0.008683000  |
| C  | 4.949805000  | 13.966991000 | -0.298880000 |
| C  | 3.999913000  | 13.935364000 | 0.722410000  |
| C  | 4.403625000  | 13.815643000 | 2.053686000  |
| C  | 6.965321000  | 15.308939000 | 4.436615000  |
| C  | 6.394395000  | 16.431728000 | 3.819124000  |
| C  | 6.876558000  | 17.707445000 | 4.113157000  |
| C  | 7.935086000  | 17.866980000 | 5.012182000  |
| C  | 8.512565000  | 16.750229000 | 5.621171000  |
| C  | 8.030115000  | 15.472517000 | 5.336478000  |
| H  | 4.364430000  | 15.471752000 | 5.284915000  |
| H  | 2.267052000  | 15.031327000 | 6.533934000  |
| H  | 1.590408000  | 12.697115000 | 7.054190000  |
| H  | 3.018297000  | 10.794108000 | 6.322684000  |
| H  | 5.124516000  | 11.232530000 | 5.064584000  |
| H  | 7.780510000  | 13.668036000 | 1.579798000  |
| H  | 7.052965000  | 13.892145000 | -0.788376000 |
| H  | 4.630963000  | 14.060372000 | -1.336335000 |
| H  | 2.939171000  | 14.002928000 | 0.486527000  |
| H  | 3.660222000  | 13.790194000 | 2.848948000  |
| H  | 5.587230000  | 16.304468000 | 3.097663000  |
| H  | 6.431223000  | 18.577109000 | 3.632704000  |
| H  | 8.314564000  | 18.864813000 | 5.232604000  |
| H  | 9.345702000  | 16.871798000 | 6.311971000  |
| H  | 8.484396000  | 14.592844000 | 5.796146000  |
| Bi | 10.060613000 | 10.388179000 | 5.166571000  |

141

[BiAu4(PPh3)4]+ Planar

|    |              |              |              |
|----|--------------|--------------|--------------|
| Au | 1.434914000  | 16.818171000 | 1.919030000  |
| Au | 2.278453000  | 14.767937000 | 0.050256000  |
| Au | 0.938627000  | 13.070181000 | 1.889100000  |
| Au | -0.327125000 | 15.065538000 | 3.472107000  |
| Bi | -0.498346000 | 15.195925000 | 0.663436000  |
| P  | 3.016248000  | 18.261935000 | 2.782029000  |
| C  | 2.606753000  | 19.016618000 | 4.384772000  |
| C  | 1.744627000  | 18.312376000 | 5.236910000  |
| C  | 1.485006000  | 18.793036000 | 6.518445000  |
| C  | 2.072176000  | 19.985575000 | 6.946317000  |
| C  | 2.909916000  | 20.705015000 | 6.088784000  |
| C  | 3.177315000  | 20.225551000 | 4.806860000  |
| C  | 3.348600000  | 19.674733000 | 1.675248000  |
| C  | 2.247466000  | 20.265414000 | 1.034522000  |
| C  | 2.426772000  | 21.389167000 | 0.231051000  |
| C  | 3.705655000  | 21.924504000 | 0.052924000  |
| C  | 4.805128000  | 21.326282000 | 0.670648000  |
| C  | 4.630423000  | 20.201395000 | 1.479083000  |
| C  | 4.630417000  | 17.456502000 | 3.049574000  |
| C  | 4.945843000  | 16.329763000 | 2.276896000  |
| C  | 6.160234000  | 15.674816000 | 2.462443000  |
| C  | 7.065027000  | 16.134799000 | 3.421390000  |
| C  | 6.749988000  | 17.248859000 | 4.201915000  |
| C  | 5.534509000  | 17.907893000 | 4.020054000  |
| P  | 4.102493000  | 14.666518000 | -1.358603000 |
| C  | 5.722139000  | 14.138829000 | -0.711992000 |
| C  | 5.779239000  | 12.938978000 | 0.013642000  |
| C  | 6.985306000  | 12.511331000 | 0.562737000  |
| C  | 8.143156000  | 13.277634000 | 0.393508000  |
| C  | 8.088636000  | 14.471863000 | -0.327350000 |
| C  | 6.881156000  | 14.907396000 | -0.877905000 |
| C  | 4.403841000  | 16.293924000 | -2.110807000 |
| C  | 5.024034000  | 16.420091000 | -3.361691000 |
| C  | 5.274065000  | 17.687515000 | -3.886595000 |
| C  | 4.902262000  | 18.827995000 | -3.168400000 |
| C  | 4.274805000  | 18.704111000 | -1.926874000 |
| C  | 4.022848000  | 17.439770000 | -1.397883000 |
| C  | 3.755812000  | 13.528042000 | -2.740817000 |
| C  | 2.423086000  | 13.394260000 | -3.160412000 |
| C  | 2.103833000  | 12.536026000 | -4.210322000 |
| C  | 3.110589000  | 11.799567000 | -4.842307000 |
| C  | 4.437143000  | 11.929029000 | -4.425128000 |
| C  | 4.762570000  | 12.792480000 | -3.377604000 |
| P  | 2.218519000  | 11.286882000 | 2.586841000  |
| C  | 3.158714000  | 10.638908000 | 1.158536000  |
| C  | 2.652612000  | 10.872289000 | -0.129821000 |
| C  | 3.334433000  | 10.397527000 | -1.249045000 |
| C  | 4.528933000  | 9.693555000  | -1.089770000 |
| C  | 5.038528000  | 9.458598000  | 0.190446000  |
| C  | 4.359001000  | 9.929135000  | 1.313035000  |
| C  | 1.271068000  | 9.886903000  | 3.261642000  |
| C  | 1.883891000  | 8.659472000  | 3.557896000  |
| C  | 1.121143000  | 7.602849000  | 4.049843000  |
| C  | -0.257251000 | 7.760748000  | 4.233377000  |
| C  | -0.869148000 | 8.978641000  | 3.934171000  |
| C  | -0.107258000 | 10.045183000 | 3.454973000  |
| C  | 3.522408000  | 11.645232000 | 3.804062000  |
| C  | 3.473178000  | 11.154272000 | 5.114499000  |
| C  | 4.502510000  | 11.453306000 | 6.009369000  |
| C  | 5.588031000  | 12.227284000 | 5.597234000  |
| C  | 5.630052000  | 12.729593000 | 4.293238000  |
| C  | 4.593025000  | 12.461360000 | 3.406086000  |
| P  | -0.121466000 | 14.705251000 | 5.736055000  |
| C  | -0.516415000 | 12.996737000 | 6.220736000  |
| C  | -1.832357000 | 12.544186000 | 6.029428000  |
| C  | -2.180717000 | 11.247547000 | 6.395967000  |
| C  | -1.216638000 | 10.387323000 | 6.931672000  |

|   |              |              |              |
|---|--------------|--------------|--------------|
| C | 0.096959000  | 10.826214000 | 7.094127000  |
| C | 0.450855000  | 12.131003000 | 6.742623000  |
| C | -1.161150000 | 15.742610000 | 6.809195000  |
| C | -1.547535000 | 17.005771000 | 6.337353000  |
| C | -2.312423000 | 17.848097000 | 7.142712000  |
| C | -2.704391000 | 17.428718000 | 8.416680000  |
| C | -2.332429000 | 16.165360000 | 8.884378000  |
| C | -1.562071000 | 15.321672000 | 8.085188000  |
| C | 1.592943000  | 15.006309000 | 6.259201000  |
| C | 1.904272000  | 15.359138000 | 7.579171000  |
| C | 3.220274000  | 15.663698000 | 7.924010000  |
| C | 4.223422000  | 15.621888000 | 6.953372000  |
| C | 3.916376000  | 15.262009000 | 5.639986000  |
| C | 2.606035000  | 14.951734000 | 5.288852000  |
| H | 2.357805000  | 14.695110000 | 4.257240000  |
| H | 4.694865000  | 15.231629000 | 4.881993000  |
| H | 5.248075000  | 15.879664000 | 7.219674000  |
| H | 3.458156000  | 15.948797000 | 8.948678000  |
| H | 1.117059000  | 15.415499000 | 8.329723000  |
| H | 1.474010000  | 12.481411000 | 6.876101000  |
| H | 0.850021000  | 10.152521000 | 7.501105000  |
| H | -1.490299000 | 9.371276000  | 7.212916000  |
| H | -3.204935000 | 10.904356000 | 6.259999000  |
| H | -2.579773000 | 13.215005000 | 5.605816000  |
| H | -1.281126000 | 14.331034000 | 8.443419000  |
| H | -2.646555000 | 15.833691000 | 9.872801000  |
| H | -3.310426000 | 18.082519000 | 9.042097000  |
| H | -2.609960000 | 18.827842000 | 6.771796000  |
| H | -1.250140000 | 17.318479000 | 5.336012000  |
| H | 8.013927000  | 15.618751000 | 3.564539000  |
| H | 6.396656000  | 14.797235000 | 1.864848000  |
| H | 4.222712000  | 15.952099000 | 1.549607000  |
| H | 7.447174000  | 17.602616000 | 4.959843000  |
| H | 5.276824000  | 18.758308000 | 4.648576000  |
| H | 1.283715000  | 17.389136000 | 4.884805000  |
| H | 0.818641000  | 18.238527000 | 7.177612000  |
| H | 1.866645000  | 20.363040000 | 7.947232000  |
| H | 3.352019000  | 21.644628000 | 6.416857000  |
| H | 3.821140000  | 20.790739000 | 4.133111000  |
| H | 5.490709000  | 19.729815000 | 1.952545000  |
| H | 5.803953000  | 21.732199000 | 0.520066000  |
| H | 3.844685000  | 22.802504000 | -0.577210000 |
| H | 1.569124000  | 21.845179000 | -0.260988000 |
| H | 1.253388000  | 19.837033000 | 1.168352000  |
| H | 3.509385000  | 17.336325000 | -0.441147000 |
| H | 3.969144000  | 19.590161000 | -1.374070000 |
| H | 5.090284000  | 19.817229000 | -3.585292000 |
| H | 5.749776000  | 17.785013000 | -4.861436000 |
| H | 5.300479000  | 15.530033000 | -3.925831000 |
| H | 5.795515000  | 12.882278000 | -3.043885000 |
| H | 5.221723000  | 11.354337000 | -4.915073000 |
| H | 2.858395000  | 11.121862000 | -5.657241000 |
| H | 1.068382000  | 12.434853000 | -4.531425000 |
| H | 1.640132000  | 13.955603000 | -2.647966000 |
| H | 1.732033000  | 11.445427000 | -0.246611000 |
| H | 2.938310000  | 10.590008000 | -2.244823000 |
| H | 5.068298000  | 9.334183000  | -1.964913000 |
| H | 5.971765000  | 8.910834000  | 0.313237000  |
| H | 4.770890000  | 9.766992000  | 2.308637000  |
| H | 2.636052000  | 10.531338000 | 5.425420000  |
| H | 6.396344000  | 12.447575000 | 6.292859000  |
| H | 6.465063000  | 13.347418000 | 3.969739000  |
| H | 4.617509000  | 12.873818000 | 2.398541000  |
| H | 4.460255000  | 11.069354000 | 7.027671000  |
| H | 2.952472000  | 8.528450000  | 3.396331000  |
| H | 1.598600000  | 6.649721000  | 4.277294000  |
| H | -0.853849000 | 6.926867000  | 4.603218000  |
| H | -1.942165000 | 9.102321000  | 4.070743000  |

|   |              |              |              |
|---|--------------|--------------|--------------|
| H | -0.574916000 | 11.004694000 | 3.225447000  |
| H | 6.837524000  | 15.847370000 | -1.425650000 |
| H | 8.986063000  | 15.074355000 | -0.457775000 |
| H | 9.086085000  | 12.946042000 | 0.827503000  |
| H | 7.014565000  | 11.582703000 | 1.129595000  |
| H | 4.874702000  | 12.346190000 | 0.146621000  |
